# Supplementary material
Source: PubMed Central journal article supplement (PMC4004266)

# ***Supporting Information***

## **Understanding the structural requirements for activators of the Kef bacterial potassium efflux system**

**Jessica Healy<sup>1†</sup>, Silvia Ekkerman<sup>2†</sup>, Christos Pliotas<sup>2</sup>, Morgiane Richard<sup>2</sup>, Wendy Bartlett<sup>2</sup>, Samuel C. Grayer<sup>1</sup>, Garrett Morris<sup>3</sup>, Samantha Miller<sup>2</sup>, Ian R. Booth<sup>2</sup>, Stuart J. Conway<sup>1†</sup>, Tim Rasmussen<sup>2†</sup>**

<sup>1</sup>From the Department of Chemistry, Chemistry Research Laboratory, University of Oxford, Mansfield Road, Oxford, OX1 3TA, United Kingdom

<sup>2</sup>School of Medical Sciences, University of Aberdeen, Institute of Medical Sciences, Foresterhill, Aberdeen, AB25 2ZD, United Kingdom

<sup>3</sup>Crysalin, Ltd, Cherwell Innovation Center, 77 Heyford Park, Upper Heyford, Oxfordshire, OX25 5HD, United Kingdom

<sup>†</sup>J. Healy and S. Ekkerman contributed equally to the work

<sup>†</sup>To whom correspondence should be addressed: Tim Rasmussen, School of Medical Sciences, University of Aberdeen, Institute of Medical Sciences, Foresterhill, Aberdeen, AB25 2ZD, United Kingdom, Tel.: 0044-1224-437540; Fax: 0044-1224-437465; E-mail: t.rasmussen@abdn.ac.uk or Stuart J. Conway, Department of Chemistry, Chemistry Research Laboratory, University of Oxford, Mansfield Road, Oxford, OX1 3TA, United Kingdom, Tel.: 0044-1865-285109; Fax: 0044-1865-285102; E-mail: stuart.conway@chem.ox.ac.uk

**Contents:**

Bacterial strains and plasmids (Table S1).....S3

Homology of SdKef to Kef systems from *E. coli* (Table S2).....S3

Analysis of ligand binding by fluorescence spectroscopy.....S4

Analysis of fluorescence competition experiments.....S6

Chemical synthesis.....S8

Supplemental figures S1 to S4.....S13

References.....S17

<sup>1</sup>H and <sup>13</sup>C NMR spectra.....S18

**Table S1: Bacterial strains and plasmids used in this study**

| Strain or plasmid           | Genotype or description                                                   | reference |
|-----------------------------|---------------------------------------------------------------------------|-----------|
| Strains                     |                                                                           |           |
| MJF276                      | F- $\Delta kdpABC5$ <i>thi rha lacI lacZ trkD1kefB157 kefC::Tn10</i>      | 1         |
| MJF335                      | MJF276 <i>gshA::Tn10(Kan)</i>                                             | 2         |
| MJF373                      | MJF276 $\Delta kefFC::kan$ , $\Delta crp$ <i>kefB::Tn10</i>               | 3         |
| Plasmids                    |                                                                           |           |
| pTrcEcKefFCH <sub>6</sub>   | KefFC from <i>Escherichia coli</i> with C-term His <sub>6</sub> on KefC   | 3         |
| pTrcSdKefH <sub>6</sub>     | Kef from <i>Shewanella denitrificans</i> OS217 with C-term H <sub>6</sub> | 3         |
| pTrcSdKefQCTDH <sub>6</sub> | Soluble domain of S.d. Kef starting at K391 and fused loop                | 3         |

**Table S2: Homology of SdKef to Kef systems from *E. coli*.** Shown are the percentages identity (**bold**) and similarity (*italic*) of the SdKef amino acid sequence to the sequences of KefC and KefB from *E. coli*. These numbers were obtained by a BLAST search (<http://blast.ncbi.nlm.nih.gov>).

| % identity or                | to EcKefC             | to EcKefB             |
|------------------------------|-----------------------|-----------------------|
| <i>%similarity</i> of SdKef: |                       |                       |
| full length                  | <b>45%</b> <i>64%</i> | <b>44%</b> <i>65%</i> |
| cytosolic domain*            | <b>41%</b> <i>60%</i> | <b>39%</b> <i>62%</i> |

\* for residue after the Q-linker from residue V402 (EcKefC numbering)

## Analysis of ligand binding by fluorescence spectroscopy.

The data were fitted using a standard saturation isotherm; where the fluorescent DNGSH ligand is L and SdKefQCTD is M and with  $M + L \rightleftharpoons ML$ .

$$K_d = \frac{[M][L]}{[ML]} \quad (1)$$

The conservation of mass for SdKefQCTD is given by  $n[M]_0 = [M] + [ML]$  where the total concentration of SdKefQCTD subunits is  $[M]_0$ ,  $n$  is the number of active binding sites per M,  $[L]_0$  is the total concentration of ligand and the concentration of free ligand is  $[L]$ . Accordingly, for DNGSH,  $[L]_0 = [L] + [ML]$ . If these expressions are substituted into equation 1, a quadratic equation for the protein-ligand complex  $[ML]$  is obtained that can be solved for  $[ML]$  and expressed as the fraction of bound ligand,  $f_B$  (equation 2). This equation considers the depletion of L upon binding and was used for direct titrations of the ligand with  $[L]_0$  as independent variable or for inverse titrations with  $[M]_0$  as independent variable.

$$f_B = \frac{[ML]}{[L]_0} = \frac{1}{2[L]_0} \left\{ (n[M]_0 + [L]_0 + K_d) - \sqrt{(n[M]_0 + [L]_0 + K_d)^2 - 4[L]_0 n[M]_0} \right\} \quad (2)$$

Two fluorescence parameters were used to obtain  $f_B$  from experimental data. The peak position in the emission spectrum,  $\lambda_{max}$ , was obtained by fitting a skewed Gaussian to the experimental spectra as described earlier (1).  $\lambda_{max}$  was used as it was less easily disturbed than fluorescence intensity. Secondly, steady state fluorescence anisotropy,  $r_{obs}$ , was used. However, using  $\lambda_{max}$  and  $r_{obs}$  requires the consideration of the quantum yield of the free ligand,  $\Phi_L$ , relative to bound ligand,  $\Phi_{ML}$ , in form of the ratio  $Q = \Phi_{ML}/\Phi_L$  (2).  $\lambda_{max}$  and  $r_{obs}$  can be expressed as simple sums depending on the fluorescence intensity of the bound and free ligand,  $I_{ML}$  and  $I_L$  (equation 3 and 4).

$$\lambda_{max} = \frac{\lambda_{ML} I_{ML} + \lambda_L I_L}{(I_{ML} + I_L)} \quad (3)$$

$$r_{obs} = \frac{r_{ML} I_{ML} + r_L I_L}{(I_{ML} + I_L)} \quad (4)$$

Intensities are defined with  $f_B$  and the quantum yields as  $I_{ML} = \Phi_{ML} f_B$  and  $I_L = \Phi_L (1 - f_B)$ , which can be substituted into equation 3 and solved for  $f_B$ :

$$f_B = \frac{1}{1 + Q \frac{(\lambda_{max} - \lambda_{ML})}{(\lambda_L - \lambda_{max})}} \quad (5)$$

This can be rearranged to solve for  $\lambda_{\max}$  as shown in equation 6.

$$\lambda_{\max} = \frac{\frac{\lambda_L}{f_B Q} - \frac{\lambda_L}{Q} + \lambda_{ML}}{\left(1 + \frac{1}{f_B Q} - \frac{1}{Q}\right)} \quad (6)$$

Similar equations to 5 and 6 can be obtained for the fluorescence anisotropy (not shown) using equation 4. Equation 6 substituted with equation 2 was used to fit the experimental data using the program Matlab2012a (Mathworks).  $\lambda_L = 572.5$  nm was measured directly on DNGSH samples. Inverse titrations with high SdKefQCTD concentrations allowed a good estimation of  $\lambda_{ML} = 530$  nm and  $Q = 4$ . These three parameters were kept fixed during the fitting while  $K_d$  and  $n$  were optimized. No corrections for non-specific binding were performed as binding experiments on the mutant Q419K indicated that levels of non-specific binding are low (see main text).

Rasmussen, T., Edwards, M. D., Black, S. S., Rasmussen, A., Miller, S., and Booth, I. R. (2010) Tryptophan in the pore of the mechanosensitive channel MscS: assessment of pore conformations by fluorescence spectroscopy. *J. Biol. Chem.* **285**, 5377–84

Jameson, D. M., and Seifried, S. E. (1999) Quantification of protein-protein interactions using fluorescence polarization. *Methods ((Amsterdam, Neth.))* **19**, 222–33

## Analysis of fluorescence competition experiments

Competition experiments were analyzed according to Thrall *et al.* (4) considering depletion of detecting fluorescence ligand DNGSH (L) and competing ligand B on the basis of a single site binding model.

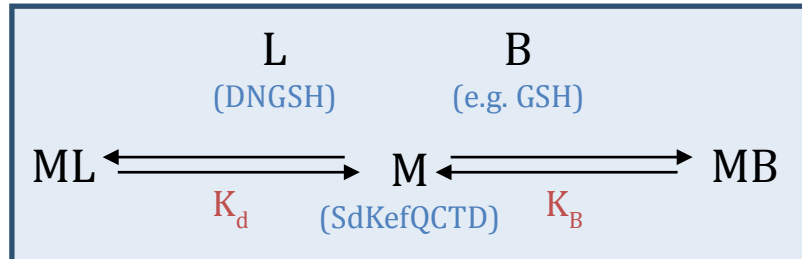

The dissociation constants are defined as:

$$K_d = \frac{[M][L]}{[ML]} \quad \text{and} \quad K_B = \frac{[M][B]}{[MB]}$$

Mass conservations are given as:

$$[M]_0 = [M] + [ML] + [MB]$$

$$[L]_0 = [L] + [ML]$$

$$[B]_0 = [B] + [MB]$$

where the indices "0" indicate the total concentrations of the species.

A cubic equation of [ML] is obtained by substitutions:

$$[ML]^3 + a[ML]^2 + b[ML] + c = 0$$

with the coefficients:

$$a = \{[M]_0(K_B - K_d) + [L]_0(2K_B - K_d) + [B]_0K_d - K_d^2 + K_dK_B\}/(K_d - K_B)$$

$$b = \{[M]_0[L]_0(K_d - 2K_B) - [L]_0^2K_B - [L]_0K_d([B]_0 + K_B)\}/(K_d - K_B)$$

$$c = [M]_0[L]_0^2K_B/(K_d - K_B)$$

The cubic equation is solved introducing T and R as:

$$T = (a^2 - 3b)/9$$

$$R = (2a^3 - 9ab + 27c)/54$$

If  $T^3 - R^2 \geq 0$ , there are three solutions of the cubic equation, one of them is meaningful:

$$\theta = \arccos\left(\frac{R}{\sqrt{T^3}}\right)$$

$$[ML]_1 = -2\sqrt{T}\cos\left(\frac{\theta}{3}\right) - \frac{a}{3}$$

$$[ML]_2 = -2\sqrt{T}\cos\left(\frac{\theta + 2\pi}{3}\right) - \frac{a}{3}$$

$$[ML]_3 = -2\sqrt{T}\cos\left(\frac{\theta + 4\pi}{3}\right) - \frac{a}{3}$$

With  $R^2 - T^3 > 0$  there is only one solution:

$$[ML] = -\text{sign}(R) \left[ \left( \sqrt[3]{\sqrt{R^2 - T^3} + |R|} + \frac{T}{\sqrt[3]{\sqrt{R^2 - T^3} + |R|}} \right) \right] - \frac{a}{3}$$

[ML] was substituted as fB into the expression for  $\lambda_{\max}$ :

$$\lambda_{\max} = \frac{\frac{\lambda_L}{f_B Q} - \frac{\lambda_L}{Q} + \lambda_{ML}}{\left(1 + \frac{1}{f_B Q} - \frac{1}{Q}\right)}$$

Fitting was performed with the known concentration of SdKefQCTD,  $[M]_0$ , and DNGSH,  $[L]_0$ , ratio of quantum yields,  $Q = 4$ , peak position of the free ligand,  $\lambda_L = 572.5$  nm, peak position of bound ligand,  $\lambda_{ML} = 530$  nm using Matlab2012a (Mathworks). The number of active sites on QCTD,  $n$ , and dissociation constant for the competitor,  $K_B$ , were optimized.

## Chemical Synthesis

### *General experimental*

**<sup>1</sup>H and <sup>13</sup>C NMR** spectra were recorded on a Bruker Avance 400 (400 MHz, 100 MHz) or Bruker Avance III (500 MHz, 125 MHz). The chemical shift data for each signal are given as  $\delta_{\text{H}}$  in units of parts per million (ppm) relative to tetramethylsilane (TMS) where  $\delta$  (TMS) = 0.00 ppm. The multiplicity of each signal is indicated by: s (singlet); br s (broad singlet); d (doublet); t (triplet); q (quartet); dd (doublet of doublets); ddd (doublet of doublet of doublets); dt (doublet of triplets) or m (multiplet). The number of protons (n) for a given resonance signal is indicated by nH. Coupling constants (J) are quoted in Hz and are recorded to the nearest 0.1 Hz. Identical proton coupling constants (J) are averaged in each spectrum and reported to the nearest 0.1 Hz. The coupling constants are determined by analysis using Bruker TopSpin software. <sup>1</sup>H and <sup>13</sup>C spectra were assigned using 2D NMR experiments including COSY, HSQC and HMBC.

**Mass spectra.** Electrospray ionization spectra were obtained on Micromass LCT; Micromass LCT Premier; and Bruker MicroTOF spectrometers operating in positive in positive or negative mode from solutions of methanol or water.

**Melting points** were obtained on a Kofler hotstage microscope, and are uncorrected. The solvent(s) from which the sample was crystallized is given in parentheses.

**Microanalyses** were obtained from the Elemental Analysis Service, London Metropolitan University, London.

**Optical rotations** were measured using Perkin Elmer Model 241 and 341 polarimeters, in cells with a path length of 1 dm. The light source was maintained at 589 nm. The concentration (c) is expressed in g/100 mL (equivalent to g/0.1 dm<sup>3</sup>).

Specific rotations are denoted  $[\alpha]_{\text{D}}^{\text{T}}$  and are given in implied units of 10<sup>-1</sup> deg cm<sup>2</sup> g<sup>-1</sup> (T = ambient temperature in °C).

**Infrared Spectra** were obtained either as: **a** thin film on sodium chloride discs or **b** as a thin film or paste on PTFE cards (as indicated). The spectra were recorded on Perkin Elmer GX FT-IR or Bruker Tensor 27 spectrometers. Absorption maxima are reported in wavenumbers (cm<sup>-1</sup>).

Lyophilisation refers to the removal of water by using a Christ Alpha 2-4 LD-2 Freeze Drier attached to a rotary-vane oil pump.

**Anhydrous** dichloromethane was obtained by passing through a column of activated alumina, according to the Grubbs procedure (5).

**Chemicals** were purchased from Sigma Aldrich or Alfa Aesar and were used without further purification. The UV light source was provided by a Philips HB175 Facial Solarium (UVA, 365 nm, P = 4 × 15 W). Reverse phase column chromatography was carried out on Fluka Ltd silica gel 100 C18-reversed phase, under a positive pressure of compressed air. Analytical TLC analysis was performed using Merck 60 RP-18 F<sub>254</sub>S aluminum-supported thin layer chromatography sheets and visualized



using UV light ( $\lambda_{\max}$  254 nm) or an ethanolic solution of ninhydrin followed by thermal development.

**In vacuo** refers to the use of a rotary evaporator attached to a diaphragm pump. Petroleum ether refers to the fraction boiling between 40-60 °C.

*N-Allyl-5-(dimethylamino)naphthalene-1-sulfonamide (2)*. To allylamine (21 mg, 28  $\mu$ L, 0.37 mmol, 1 eq), and diisopropylethylamine (239 mg, 1.85 mmol, 5 eq) in  $\text{CH}_2\text{Cl}_2$  (5 mL) was added a solution of dansyl chloride (100 mg, 0.37 mmol, 1 eq) in  $\text{CH}_2\text{Cl}_2$  (3 mL). The reaction was allowed to stir overnight at RT. After 18 h the reaction was adjudged to be complete by TLC analysis, was concentrated *in vacuo* and purified by silica gel column chromatography (20:80 ethyl acetate: petroleum ether), furnishing *N-allyl-5-(dimethylamino)naphthalene-1-sulfonamide 2* (109 mg, 100%) as a fluorescent yellow crystalline solid:  $R_f$  0.15 (ethyl acetate/petroleum ether 20:80); m.p. 62-66 °C ( $\text{CH}_2\text{Cl}_2$ );  $\nu_{\max}$  (thin film)/ $\text{cm}^{-1}$ ; 1644 (s), 1316 (m);  $^1\text{H}$  NMR (400 MHz,  $\text{CDCl}_3$ ):  $\delta$  8.56 (d,  $J$  = 8.6 Hz, 1H), 8.30 (d,  $J$  = 8.6 Hz, 1H), 8.26 (d,  $J$  = 8.6 Hz, 1H), 7.58 (dd,  $J$  = 7.8, 1.1 Hz, 1H), 7.53 (dd,  $J$  = 7.8, 1.1 Hz, 1H), 7.2 (d,  $J$  = 7.6 Hz, 1H), 5.69-5.57 (m, 1H), 5.09 (dt,  $J$  = 17.0, 1.2 Hz, 1H), 5.01 (dt,  $J$  = 10.2, 1.2 Hz, 1H), 4.75 (t,  $J$  = 6.2 Hz, 1H), 3.54 (ddd,  $J$  = 12.2, 6.2, 1.2 Hz, 2H), 2.90 (s, 6H);  $^{13}\text{C}$  NMR (100 MHz,  $\text{CDCl}_3$ ):  $\delta$  151.9, 134.7, 133.0, 130.5, 129.8, 129.6, 129.6, 128.4, 123.2, 118.8, 117.5, 115.3, 45.8, 45.4; HRMS  $m/z$  ( $\text{ES}^+$ ) [Found;  $(\text{M}+\text{Na})^+$  313.0891  $\text{C}_{15}\text{H}_{18}\text{N}_2\text{NaO}_2\text{S}$  requires  $\text{M}^+$ , 313.0987];  $m/z$  289.10 ( $[\text{M}-\text{H}]^-$ , 100%); Anal. Calcd. for  $\text{C}_{15}\text{H}_{18}\text{N}_2\text{O}_2\text{S}$ : C, 62.0; H, 6.2; N, 9.6. Found: C, 62.0; H, 6.3; N, 9.6.

*S-((5-(Dimethylamino)naphthalen-1-yl)sulfonylaminopropyl) glutathione (3)*. *N-Allyl-5-(dimethylamino)naphthalene-1-sulfonamide* (100 mg, 0.34 mmol, 1 eq), L-glutathione (420 mg, 1.36 mmol, 4 eq), TCEP·HCl (194 mg, 0.68 mmol, 2 eq) and 2,2-dimethoxyphenyl acetophenone (17 mg, 0.07 mmol, 0.2 eq) were stirred at RT in THF/ $\text{H}_2\text{O}$  (1:2, 3 mL) in the presence of light (365 nm, 4  $\times$  15 W) for 5 h. After which time the reaction was extracted with  $\text{CH}_2\text{Cl}_2$  (2  $\times$  5 mL). The aqueous layer was lyophilized and the crude material purified by RP C-18 silica gel column chromatography (MeOH/ $\text{H}_2\text{O}$  0:100, 50:50), furnishing *S-((5-(dimethylamino)naphthalen-1-yl)sulfonylaminopropyl) glutathione 3* (88 mg, 40%) as a hygroscopic yellow solid:  $R_f$  0.35 (MeOH: $\text{H}_2\text{O}$  50:50);  $[\alpha]_D^{20}$  -19.2 (c 0.25,  $\text{H}_2\text{O}$ );  $\nu_{\max}$  (PTFE card)/ $\text{cm}^{-1}$ ; 3057 (w), 1719 (m), 1647 (m), 1527 (m), 1153 (m);  $^1\text{H}$  NMR (500 MHz,  $\text{D}_2\text{O}$ ):  $\delta$  8.35 (d,  $J$  = 8.5 Hz, 1H), 8.15 (d,  $J$  = 8.5 Hz, 1H), 8.11 (d,  $J$  = 7.5 Hz, 1H), 7.88-7.55 (m, 2H), 7.26 (d,  $J$  = 7.5 Hz, 1H), 4.20 (dd,  $J$  = 8.5, 5.1 Hz, 1H), 3.67-3.52 (m, 3H), 2.85 (t,  $J$  = 6.8 Hz, 2H), 2.73 (s, 6H), 2.43 (dd,  $J$  = 13.9, 5.1 Hz, 1H), 2.39-2.28 (m, 3H), 2.07 (t,  $J$  = 6.8 Hz, 2H), 2.04-1.96 (m, 2H), 1.34 (qn,  $J$  = 6.8 Hz, 2H);  $^{13}\text{C}$  NMR (125 MHz;  $\text{D}_2\text{O}$ ):  $\delta$  176.0, 174.7, 173.9, 171.6, 151.3, 133.9, 130.1, 129.9, 128.9, 128.8, 128.7, 128.3, 123.9, 119.0, 115.9, 54.1, 52.8, 44.8, 43.2, 40.7, 32.5, 31.4, 28.2, 27.6, 26.2; HRMS  $m/z$  ( $\text{ES}^-$ ) [Found;  $(\text{M}-\text{H})^-$  596.1852  $\text{C}_{25}\text{H}_{34}\text{N}_5\text{O}_8\text{S}_2$  requires  $\text{M}^-$ , 596.1854];  $m/z$  ( $\text{ES}^-$ ) 596.2 ( $[\text{M}-\text{H}]^-$ , 100%); Anal. Calcd for  $\text{C}_{25}\text{H}_{35}\text{N}_5\text{O}_8\text{S}_2$ : C, 50.2; H, 5.9; N, 11.7. Found 50.1; H, 5.7; N, 11.7.

*General procedure for the synthesis of GSX via 1,4-addition*. L-GSH (100 or 200 mg, 0.325 or 0.65 mmol, 1 eq) and NaOH (13 or 26 mg, 0.325 or 0.65 mmol, 1 eq) were stirred in 50:50 MeOH: $\text{H}_2\text{O}$  (2.5 or 5 mL), to this solution an enone was added (0.325 or 0.65 mmol, 1 eq) and the resulting solution stirred at RT (20 min-48 h). The

reaction solution was concentrated *in vacuo* and purified by RP C-18 silica gel column chromatography (MeOH:H<sub>2</sub>O, 0:100, 20:80 50:50) and lyophilized. In some cases, multiple RP C-18 columns were required to isolate the product in sufficient purity for biological testing.

*S-N-Ethylsuccinimido glutathione (ESG)*. After 2 columns *S-N*-ethylsuccinimido glutathione (630 mg, 90%, mixture of diastereomers) was isolated as a colorless foamy solid: R<sub>f</sub> 0.72 (H<sub>2</sub>O);  $[\alpha]_D^{20}$  -12.3 (c 1.0, H<sub>2</sub>O); <sup>1</sup>H NMR (400 MHz; D<sub>2</sub>O): δ 4.60-4.52 (m, 1H), 3.94 (dd, *J* = 9.3, 4.1 Hz, 0.5H), 3.93 (dd, *J* = 9.3, 4.1 Hz, 0.5H), 3.68-3.64 (m, 3H), 3.42 (q, *J* = 7.2 Hz, 2H), 3.27-2.86 (m, 3H), 2.59 (dd, *J* = 8.1, 4.2 Hz, 0.5H), 2.55 (dd, *J* = 8.1, 4.2 Hz, 0.5H), 2.40-2.45 (m, 2H), 2.01-2.08 (m, 2H), 1.01 (t, *J* = 7.2 Hz, 1.5H), 1.00 (t, *J* = 7.2 Hz, 1.5H); *m/z* (ES<sup>+</sup>) 455 ([M+Na]<sup>+</sup>, 100%), Anal. Calcd. for C<sub>16</sub>H<sub>24</sub>N<sub>4</sub>O<sub>8</sub>S: C, 44.4; H, 5.6; N, 13.0. Found C, 44.3; H, 5.4; N, 12.8 (6).

*S-N-Methylsuccinimido glutathione (4)*. RP C-18 silica gel column furnished *S-N*-methylsuccinimido glutathione (**4**) (mixture of diastereoisomers) as a hygroscopic colorless solid (132 mg, 97%); R<sub>f</sub> 0.7 (H<sub>2</sub>O);  $[\alpha]_D^{20}$  -13.7 (c 1.0, H<sub>2</sub>O);  $\nu_{\max}$  (solid)/cm<sup>-1</sup>: 3255 (m), 1693 (s), 1588 (s); <sup>1</sup>H NMR (500 MHz, D<sub>2</sub>O): δ 4.57 (dd, *J* = 8.0, 5.0 Hz, 0.5H), 4.54 (dd, *J* = 9.1, 5.0 Hz, 0.5H), 3.64-3.60 (m, 3H), 3.27-3.10 (m, 2H), 3.09 (dd, *J* = 14.4, 8.3 Hz, 0.5H), 2.89 (dd, *J* = 14.4, 9.2 Hz, 0.5H), 2.84 (s, 3H), 2.55 (dd, *J* = 9.8, 4.3 Hz 0.5H), 2.60 (dd, *J* = 9.8, 4.3 Hz, 0.5H), 2.45-2.38 (m, 2H), 2.08-2.03 (m, 2H); <sup>13</sup>C NMR (125 MHz, D<sub>2</sub>O): δ Diastereomer 1; 179.7, 178.5, 176.2, 175.0, 173.9, 171.5, 54.1, 53.1, 43.4, 40.8, 36.1, 32.9, 31.4, 26.2, 25.0; Diastereomer 2; 179.6, 178.5, 176.2, 174.9, 173.9, 171.5, 54.1, 52.8, 43.4, 40.1, 35.9, 32.8, 31.4, 26.1, 25.0; HRMS *m/z* (ES<sup>-</sup>) [Found; (M-H)<sup>-</sup> 417.1089 C<sub>15</sub>H<sub>21</sub>N<sub>4</sub>O<sub>8</sub>S requires M<sup>+</sup>, 417.1080] *m/z* (ES<sup>-</sup>) 417 ([M-H]<sup>-</sup>, 100 %); Anal. Calcd for C<sub>15</sub>H<sub>22</sub>N<sub>4</sub>O<sub>8</sub>S: C, 43.0; H, 5.3; N, 13.4. Found: C, 42.9; H, 5.4; N, 13.0.

*S-N-tert-Butylsuccinimido glutathione (5)*. RP C-18 silica gel column furnished *S-N*-*tert*-butylsuccinimido glutathione (**5**) (mixture of diastereoisomers) as a colorless hygroscopic solid (110 mg, 75%); R<sub>f</sub> 0.7 (H<sub>2</sub>O);  $[\alpha]_D^{20}$  -4.0 (c 0.5, H<sub>2</sub>O);  $\nu_{\max}$  (solid)/cm<sup>-1</sup>: 3271 (m), 2980 (w), 1698 (s), 1645 (s), 1596 (m); <sup>1</sup>H NMR (400 MHz, D<sub>2</sub>O): δ 4.59 (dd, *J* = 4.7, 3.2 Hz, 0.5H), 4.57 (dd, *J* = 4.7 3.2 Hz, 0.5H), 3.82 (dd, *J* = 9.2, 4.3 Hz, 0.5H), 3.78 (dd, *J* = 9.2, 4.3 Hz, 0.5H), 3.72-3.66 (m, 3H), 3.26 (dd, *J* = 9.1, 4.7 Hz, 0.5H), 3.25 (dd, *J* = 9.1, 4.7 Hz, 0.5H), 3.19-3.01 (m, 2H), 2.90 (dd, *J* = 14.1, 9.1 Hz, 0.5H), 2.52-2.39 (m, 2.5H), 2.11-2.03 (m, 2H), 1.45 (s, 9H); <sup>13</sup>C NMR (100 MHz, D<sub>2</sub>O): δ Diastereomer 1: 180.5, 179.4, 176.4, 175.2, 174.2, 171.8, 53.6, 53.1, 43.7, 40.3, 36.3, 32.9, 31.8, 27.7, 25.5; Diastereomer 2: 180.5, 179.4, 176.4, 175.3, 174.2, 171.9, 54.5, 53.1, 43.7, 41.2, 36.6, 33.2, 31.8, 27.7, 25.6; HRMS *m/z* (ES<sup>-</sup>) [Found; (M-H)<sup>-</sup> 459.1557. C<sub>18</sub>H<sub>27</sub>N<sub>4</sub>O<sub>8</sub>S requires M<sup>+</sup>, 459.1550.]; *m/z* (ES<sup>-</sup>) 459 ([M-H]<sup>-</sup>, 100 %).

*S-N-Benzylsuccinimido glutathione (6)*. RP C-18 silica gel column furnished *S-N*-benzylsuccinimido glutathione (**6**) (mixture of diastereoisomers) as a colorless hygroscopic solid (136 mg, 86%); R<sub>f</sub> 0.7 (H<sub>2</sub>O);  $[\alpha]_D^{20}$  -5.4 (c 0.5, H<sub>2</sub>O);  $\nu_{\max}$  (solid)/cm<sup>-1</sup>: 3277 (m), 1698 (s), 1643 (s), 1595 (s); <sup>1</sup>H NMR (400 MHz, D<sub>2</sub>O): δ 7.30-7.19 (m, 5H), 4.57 (s, 2H), 4.53 (dd, *J* = 8.6, 5.1 Hz, 1H), 3.98 (dd, *J* = 9.2, 3.9 Hz,

0.5H), 3.95 (dd,  $J = 9.2, 3.9$  Hz, 0.5H), 3.72-3.58 (m, 3H), 3.27-3.14 (m, 1.5H), 3.09 (dd,  $J = 13.8, 5.4$  Hz, 0.5H), 2.99 (dd,  $J = 13.8, 8.4$  Hz, 0.5H), 2.85 (dd,  $J = 13.8, 8.4$  Hz, 0.5H), 2.63 (dd,  $J = 11.3, 4.1$  Hz, 0.5H), 2.58 (dd,  $J = 11.3, 4.1$  Hz, 0.5H), 2.45-2.38 (m, 2H), 2.08-2.01 (m, 2H);  $^{13}\text{C}$  NMR (100 MHz,  $\text{D}_2\text{O}$ ):  $\delta$  Diastereoisomer 1; 193.8, 179.4, 178.2, 176.5, 175.1, 174.3, 174.7, 135.5, 129.3, 128.5, 128.1, 128.0, 53.5, 52.9, 43.1, 42.8, 40.9, 36.1, 32.9, 31.7, 26.4; Diastereoisomer 2; 193.8, 179.4, 178.3, 176.5, 175.2, 174.3, 174.8, 135.5, 129.3, 128.5, 128.1, 128.0, 54.5, 52.9, 43.1, 42.8, 40.2, 36.1, 33.1, 31.8, 26.5; HRMS  $m/z$  ( $\text{ES}^-$ ) [Found;  $(\text{M}-\text{H})^-$  493.1398  $\text{C}_{21}\text{H}_{25}\text{N}_4\text{O}_8\text{S}$  requires  $\text{M}^-$ , 493.1393.];  $m/z$  ( $\text{ES}^+$ ) 517 ( $[\text{M}+\text{Na}]^+$ , 100 %); Anal. Calcd for  $\text{C}_{21}\text{H}_{26}\text{N}_4\text{O}_8\text{S}\cdot 2\text{H}_2\text{O}$ : C, 47.5; H, 5.7; N, 10.5. Found: C, 47.4; H, 5.7; N, 10.7.

*S-N-Cyclohexylsuccinimido glutathione (7)*. RP C-18 silica gel column furnished *S-N-cyclohexylsuccinimido glutathione (7)* (1:1 mixture of diastereoisomers) as colorless hygroscopic solid (116 mg, 74%);  $R_f$  0.65 ( $\text{H}_2\text{O}$ );  $[\alpha]_D^{20} -7.0$  (c 0.5,  $\text{H}_2\text{O}$ );  $\nu_{\text{max}}$  (solid)/ $\text{cm}^{-1}$ ; 3271 (m), 2933 (w), 1693 (s), 1643 (s);  $^1\text{H}$  NMR (400 MHz,  $\text{D}_2\text{O}$ ):  $\delta$  4.55 (dd,  $J = 8.3, 5.2$  Hz, 0.5H), 4.53 (dd,  $J = 9.0, 4.9$  Hz, 0.5H), 3.89-3.76 (m, 2H), 3.71-3.58 (m, 3H), 3.22 (dd,  $J = 14.3, 5.2$  Hz, 0.5H), 3.16-3.06 (m, 1.5H), 3.02 (dd,  $J = 14.3, 8.3$  Hz, 0.5H), 2.87 (dd,  $J = 14.3, 9.0$  Hz, 0.5H), 2.56-2.47 (m, 1H), 2.45-2.39 (m, 2H), 2.10-2.02 (m, 2H), 1.86 (q,  $J = 12.3$  Hz, 2H), 1.73-1.65 (m, 2H), 1.55-1.46 (m, 4H), 1.24-1.11 (m, 2H);  $^{13}\text{C}$  NMR (100 MHz,  $\text{D}_2\text{O}$ ):  $\delta$  Diastereomer 1; 179.9, 178.9, 176.5, 175.3, 174.2, 171.9, 54.4, 53.5, 52.9, 43.7, 40.8, 36.3, 31.8, 28.5, 28.5, 26.5, 25.7, 25.1; Diastereomer 2: 179.9, 178.9, 176.5, 175.2, 174.2, 171.8, 54.4, 53.1, 52.9, 43.7, 40.0, 36.0, 31.9, 28.5, 28.5, 26.6, 25.7, 25.1; HRMS  $m/z$  ( $\text{ES}^+$ ) [Found;  $(\text{M}+\text{Na})^+$  509.1662.  $\text{C}_{20}\text{H}_{30}\text{N}_4\text{NaO}_8\text{S}$  requires  $\text{M}^+$ , 509.1677.];  $m/z$  ( $\text{ES}^-$ ) 485 ( $[\text{M}-\text{H}]^-$ , 100 %).

*S-Cyclopentan-2,4-dion-1-yl glutathione (8)*. Three RP C-18 silica gel columns ( $\text{H}_2\text{O}$ , 20:80 MeOH: $\text{H}_2\text{O}$ , 50:50 MeOH: $\text{H}_2\text{O}$ ), furnished *S-cyclopentan-2,4-dion-1-yl glutathione 8* (mixture of diastereomers, 98 mg, 37%) as a hygroscopic yellow solid:  $R_f$  0.69 (MeOH/ $\text{H}_2\text{O}$  50:50);  $\nu_{\text{max}}$  (PTFE card)/ $\text{cm}^{-1}$ ; 2964 (w), 1718 (s);  $^1\text{H}$  NMR (400 MHz;  $\text{D}_2\text{O}$ ):  $\delta$  4.48 (dd,  $J = 8.0, 5.0$  Hz, 1H), 4.45 (dd,  $J = 8.0, 4.6$  Hz, 1H), 3.72-3.54 (m, 4H), 2.97-2.90 (m, 1H), 2.89-2.75 (m, 4H), 2.52-2.36 (m, 2H), 2.28 (dd,  $J = 10.4, 2.4$  Hz, 1H), 2.25 (dd,  $J = 10.4, 2.4$  Hz, 1H), 2.12-2.02 (m, 2H);  $^{13}\text{C}$  NMR (100 MHz;  $\text{D}_2\text{O}$ ):  $\delta$  diastereomer 1: 206.1, 203.7, 176.6, 175.2, 174.4, 172.2, 54.4, 53.6, 49.2, 46.3, 43.7, 42.2, 31.6, 30.9, 25.5;  $\delta$  diastereomer 2: 206.1, 203.8, 176.6, 175.2, 174.4, 172.2, 54.4, 53.7, 49.2, 46.6, 43.7, 42.4, 31.6, 31.1, 25.5; HRMS  $m/z$  ( $\text{ES}^+$ ) [Found;  $(\text{M}+\text{Na})^+$  426.0941  $\text{C}_{15}\text{H}_{21}\text{N}_3\text{NaO}_8\text{S}$  requires  $\text{M}^+$ , 426.0947];  $m/z$  ( $\text{ES}^-$ ) 402 ( $[\text{M}-\text{H}]^-$ , 100 %).

*S-Cyclopentan-2-on-1-yl glutathione (9)*. Two RP C-18 silica gel columns ( $\text{H}_2\text{O}$ , 20:80 MeOH:  $\text{H}_2\text{O}$ , 50:50 MeOH: $\text{H}_2\text{O}$ ), furnished *S-cyclopentan-2-on-1-yl glutathione 9* (mixture of diastereomers, 45 mg, 18%) as a colorless hygroscopic solid:  $R_f$  0.66 (RP MeOH/ $\text{H}_2\text{O}$  50:50);  $^1\text{H}$  NMR (400 MHz,  $\text{D}_2\text{O}$ ):  $\delta$  4.55-4.49 (m, 1H), 3.71-3.64 (m, 3H), 3.51 (t,  $J = 6.1$  Hz, 1H), 3.06 (dd,  $J = 14.5, 5.1$  Hz, 1H), 3.04 (dd,  $J = 14.5, 5.1$  Hz, 1H), 2.90-2.79 (m, 1H), 2.48-2.17 (m, 4H), 1.92-1.79 (m, 1H), 2.06 (dd,  $J = 14.0, 7.1$  Hz, 2H);  $m/z$  ( $\text{ES}^+$ ) 412 ( $[\text{M}+\text{Na}]^+$ , 100%). The data are in good agreement with the literature values (7).

*S-Pentan-3-on-1-yl glutathione (10)*. RP C-18 silica gel column furnished *S-pentan-3-on-1-yl glutathione (10)* as a colorless hygroscopic solid (123 mg, 96%);  $R_f$  0.6 (MeOH/H<sub>2</sub>O 50:50);  $[\alpha]_D^{20}$  -25.2 (c 0.5 in H<sub>2</sub>O); <sup>1</sup>H NMR (500 MHz, D<sub>2</sub>O):  $\delta$  4.49 (dd,  $J = 9.0, 4.9$  Hz, 1H), 3.73-3.63 (m, Gly-CH<sub>2</sub>, 3H), 3.00 ( $J = 14.1, 4.9$  Hz, 1H), 2.82-2.66 (m, 4H), 2.51-2.39 (m, 4H), 2.09-2.03 (m, 2H), 0.92 (t,  $J = 7.5$  Hz, 3H); <sup>13</sup>C NMR (125 MHz, D<sub>2</sub>O):  $\delta$  216.5, 176.1, 175.0, 174.2, 171.9, 54.1, 53.0, 43.3, 41.5, 35.9, 33.1, 31.4, 26.3, 25.4, 7.0; HRMS  $m/z$  (ES<sup>+</sup>) [Found; (M+Na)<sup>+</sup> 414.1295. C<sub>15</sub>H<sub>25</sub>N<sub>3</sub>O<sub>7</sub>SNa requires M<sup>+</sup>, 414.1305.];  $m/z$  (ES<sup>-</sup>) 390 ([M-H]<sup>-</sup>, 100 %).

*S-Hexan-3-on-1-yl glutathione (11)*. RP C-18 silica gel column furnished *S-hexan-3-on-1-yl glutathione (11)* as hygroscopic colorless solid (120 mg, 93%);  $R_f$  0.54 (MeOH/H<sub>2</sub>O 50:50);  $[\alpha]_D^{20}$  -23.0 (c 0.5 in H<sub>2</sub>O); <sup>1</sup>H NMR (400 MHz, D<sub>2</sub>O):  $\delta$  4.45 (dd,  $J = 9.0, 5.0$  Hz, 1H), 3.66 (d,  $J = 17.2$  Hz, 1H), 3.65-3.62 (m, 1H), 3.61 (d,  $J = 17.2$  Hz, 2H), 2.95 (dd,  $J = 14.2, 5.0$  Hz, 1H), 2.79-2.61 (m, 5H), 2.44-2.35 (m, 4H), 2.08-1.99 (m, 2H), 1.43 (sx,  $J = 7.4$  Hz, 2H), 0.75 (t,  $J = 7.4$  Hz, 3H); <sup>13</sup>C NMR (125 MHz, D<sub>2</sub>O):  $\delta$  216.2, 176.2, 174.9, 174.0, 171.9, 54.1, 53.2, 44.6, 43.3, 41.9, 33.1, 31.4, 26.2, 25.4, 16.9, 12.9; HRMS  $m/z$  (ES<sup>-</sup>) [Found; (M-H)<sup>-</sup> 404.1491 C<sub>16</sub>H<sub>27</sub>N<sub>3</sub>O<sub>7</sub>S requires M<sup>-</sup>, 404.1491];  $m/z$  (ES<sup>-</sup>) 404 ([M-H]<sup>-</sup>, 100 %).

*S-Octan-3-on-1-yl glutathione (12)*. RP C-18 silica gel column furnished *S-octan-3-on-1-yl glutathione 12* (151 mg, 54%) as a hygroscopic yellow solid:  $R_f$  0.13 (MeOH/H<sub>2</sub>O 50:50);  $[\alpha]_D^{20}$  -26.4 (c 0.25 in H<sub>2</sub>O);  $\nu_{max}$  (PTFE card)/cm<sup>-1</sup>; 2961 (w), 1774 (w), 1735 (w); <sup>1</sup>H NMR (400 MHz, D<sub>2</sub>O):  $\delta$  4.45 (dd,  $J = 9.0, 5.0$  Hz, 1H), 3.66-3.61 (m, 3H), 2.95 (dd,  $J = 14.4, 5.0$  Hz, 1H), 2.78-2.61 (m, 5H), 2.43-2.37 (m, 4H), 2.03 (qn,  $J = 6.8$  Hz, 2H), 1.42 (qn  $J = 7.3$  Hz, 2H), 1.20-1.07 (m, 4H), 0.73 (t,  $J = 6.8$  Hz, 3H); <sup>13</sup>C NMR (100 MHz, D<sub>2</sub>O):  $\delta$  216.8, 176.5, 175.2, 174.2, 172.2, 54.4, 53.4, 43.6, 42.8, 42.2, 33.5, 31.7, 30.9, 26.6, 25.8, 23.4, 22.1, 13.5; HRMS  $m/z$  (ES<sup>+</sup>) [Found; (M+H)<sup>+</sup> 434.1954 C<sub>18</sub>H<sub>32</sub>N<sub>3</sub>O<sub>7</sub>S requires M<sup>+</sup>, 434.1961];  $m/z$  (ES<sup>+</sup>) 456.1 ([M+Na]<sup>+</sup>, 100 %); Anal. Calcd for C<sub>18</sub>H<sub>31</sub>N<sub>3</sub>O<sub>7</sub>S: C, 49.9; H, 7.2; N, 9.7. Found: C, 49.8; H, 7.2; N, 9.6.

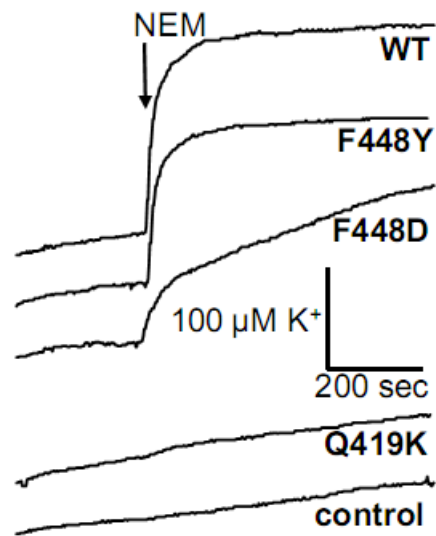

**Figure S1: Potassium efflux experiments for SdKef mutants.** Potassium efflux from *E. coli* strain MJF335 transformed with SdKef WT and the mutants F448Y, F448D, and Q419K after treatment with 0.5 mM NEM. Cells were grown in the presence of GSH. A control of the strain in the absence of Kef-plasmids is shown which was exposed to the same concentrations of electrophiles.

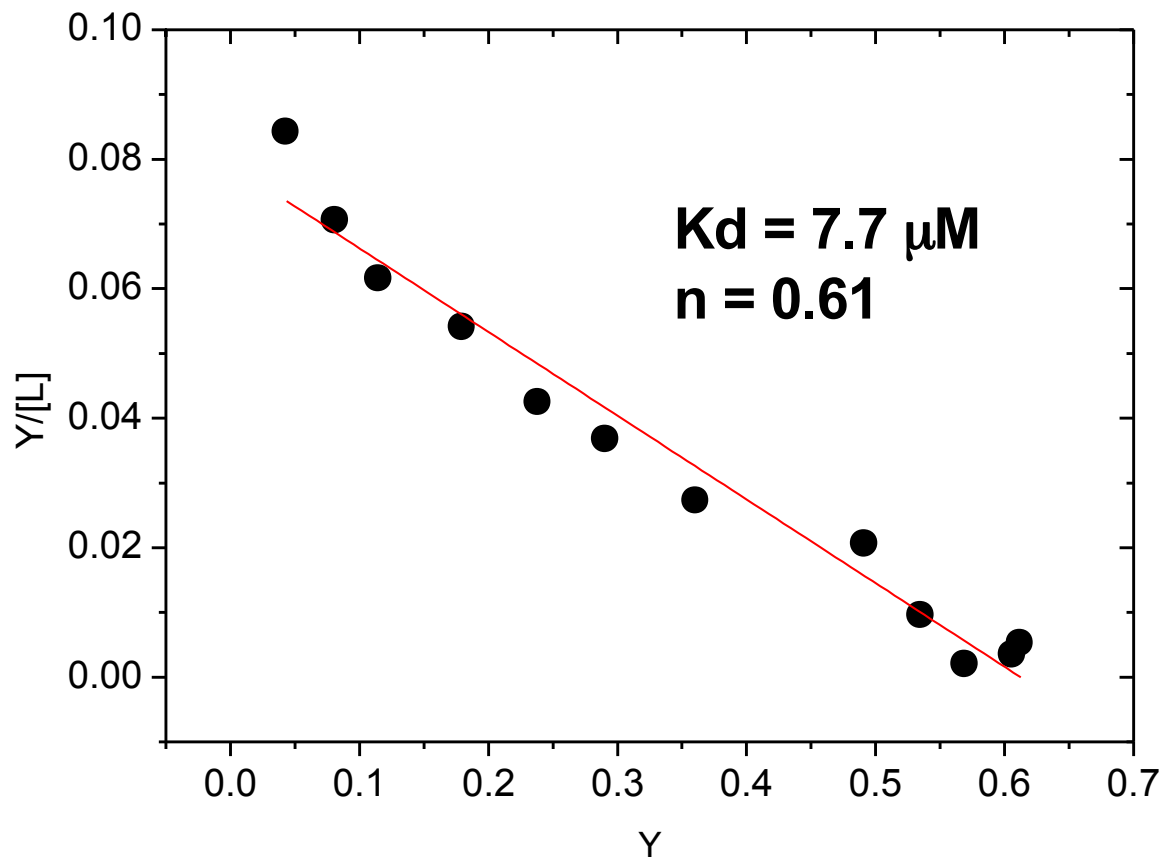

**Figure S2: Scatchard plot for DNGSH binding.** Shown is an example for DNGSH binding to SdKefQCTD. Linear fitting provide estimates for the dissociation constant,  $K_d$ , and binding stoichiometry,  $n$ .

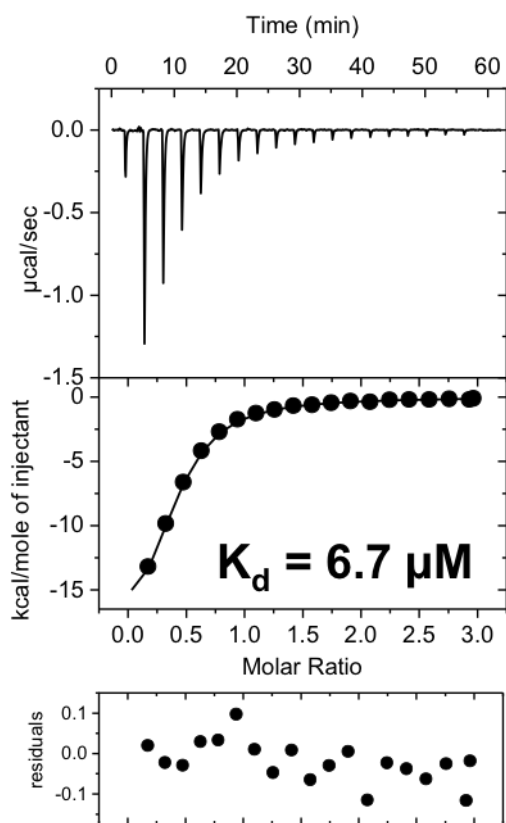

**Figure S3: ITC binding experiments for the GSH adduct of *t*-butylmaleimide (5) with SdKefQCTD.** Titration of **5** is shown with an SdKefQCTD concentration of 49  $\mu\text{M}$ . Residuals are shown for a single-site binding model. A representative curve from a single experiment is shown.

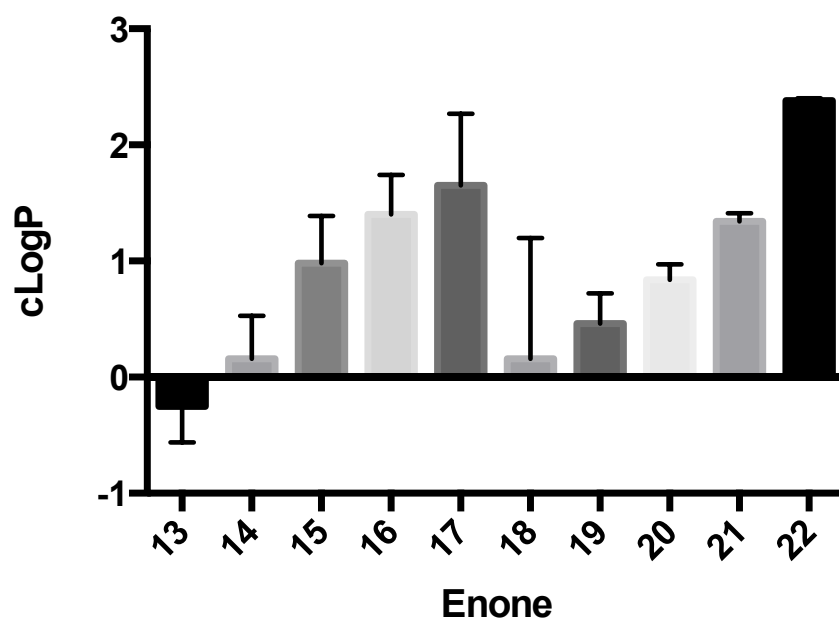

**Figure S4:** Bar graph representing cLogP of the enones employed in this study. LogP values were calculated using Virtual Computational Chemistry Laboratory (8).



## REFERENCES

- (1) Ness, L S, Booth, I R (1999) Different foci for the regulation of the activity of the KefB and KefC glutathione-gated K<sup>+</sup> efflux systems. *J. Biol. Chem.* **274**, 9524-9530.
- (2) Miller, S, Douglas, R M, Carter, P, and Booth, I R (1997) Mutations in the glutathione-gated KefC K<sup>+</sup> efflux system of Escherichia coli that cause constitutive activation. *J. Biol. Chem.* **272**, 24942-24947
- (3) Ekkerman, S, Pliotas, C, Kinghorn, S, Miller, S, Rasmussen, T, unpublished results.
- (4) Thrall, S. H., Reinstein, J., Wöhrl, B. M., and Goody, R. S. (1996) Evaluation of human immunodeficiency virus type 1 reverse transcriptase primer tRNA binding by fluorescence spectroscopy: specificity and comparison to primer/template binding. *Biochemistry* **35**, 4609–18
- (5) Pangborn A. B., Giardello M. A., Grubbs R. H., Rosen R. K. and Timmers F. J. (1996) Safe and Convenient Procedure for Solvent Purification. *Organometallics* **15**, 1518-1520
- (6) Roosild, T. P., Castronovo, S., Healy, J., Miller, S., Pliotas, C., Rasmussen, T., Bartlett, W., Conway, S. J., and Booth, I. R. (2010) Mechanism of ligand-gated potassium efflux in bacterial pathogens. *Proc. Natl. Acad. Sci. U. S. A.* **107**, 19784–19789
- (7) Bickley J. F., Ciucci A., Evans P., Roberts S. M., Rossa N. and Santorob M.G. (2004) Reactions of some cyclopentenones with selected cysteine derivatives and biological activities of the product thioethers. *Bioorg. Med. Chem.* **12**, 3221–3227
- (8) Tetko I. V., Gasteiger J., Todeschini R., Mauri A., Livingstone, D., Ertl P., Palyulin V. A., Radchenko E. V., Zefirov N. S., Makarenko A. S., Tanchuk V. Y., Prokopenko V. V. (2005) Virtual computational chemistry laboratory - design and description, *J. Comput. Aid. Mol. Des.* **19**, 453-63

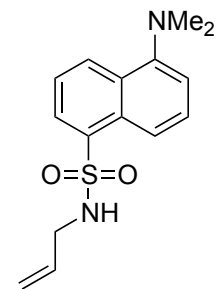

*N*-Allyl-5-(dimethylamino)naphthalene-1-sulfonamide (**2**)

Current Data Parameters  
NAME Sep25-2009-19  
EXPNO 1  
PROCNO 1

F2 - Acquisition Parameters  
Date\_ 20090925  
Time\_ 16.33  
INSTRUM av400  
PROBHD 5 mm QNP 1H/13  
PULPROG zg60  
TD 65536  
SOLVENT CDCl3  
NS 16  
DS 2  
SWH 8278.146 Hz  
FIDRES 0.126314 Hz  
AQ 3.9584243 sec  
RG 181  
DW 60.400 usec  
DE 7.50 usec  
TE 300.0 K  
D1 1.00000000 sec

===== CHANNEL f1 =====  
NUC1 1H  
P1 9.00 usec  
PL1 0.00 dB  
SFO1 400.2024714 MHz

F2 - Processing parameters  
SI 32768  
SF 400.2000028 MHz  
WDW EM  
SSB 0  
LB 0.30 Hz  
GB 0  
PC 1.00

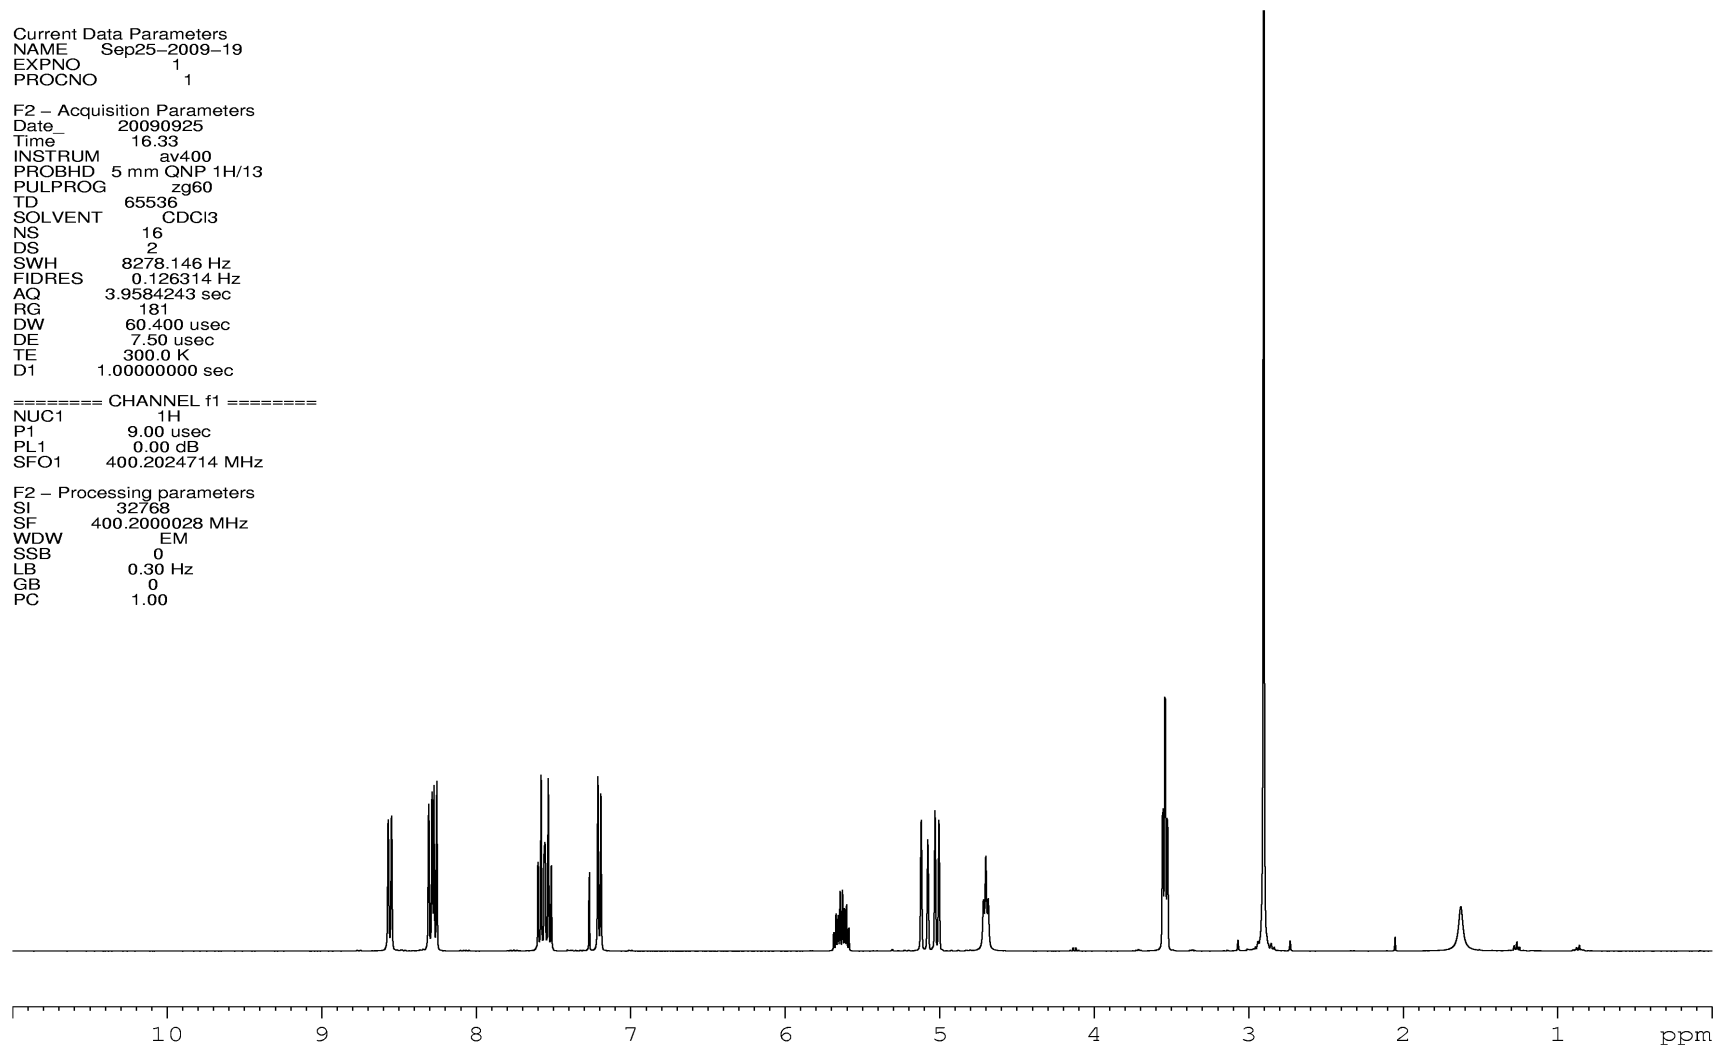

*N*-Allyl-5-(dimethylamino)naphthalene-1-sulfonamide (**2**)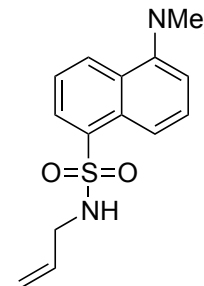

Current Data Parameters  
NAME May29-2012-13  
EXPNO 2  
PROCNO 1

F2 - Acquisition Parameters  
Date\_ 20120530  
Time 13.51  
INSTRUM av400  
PROBHD 5 mm QNP 1H/13  
PULPROG zgpg30  
TD 32768  
SOLVENT CDCl3  
NS 256  
DS 4  
SWH 26178.010 Hz  
FIDRES 0.798889 Hz  
AQ 0.6259188 sec  
RG 32768  
DW 19.100 usec  
DE 7.50 usec  
TE 300.0 K  
D1 1.0000000 sec  
D11 0.0300000 sec  
TDO 1

===== CHANNEL f1 =====  
NUC1 13C  
P1 9.50 usec  
PL1 0.00 dB  
SFO1 100.6403931 MHz

===== CHANNEL f2 =====  
CPDPRG2 waltz16  
NUC2 1H  
PCPD2 80.00 usec  
PL2 0.00 dB  
PL12 19.00 dB  
PL13 25.00 dB  
SFO2 400.2016008 MHz

F2 - Processing parameters  
SI 32768  
SF 100.6303718 MHz  
WDW EM  
SSB 0  
LB 1.00 Hz  
GB 0  
PC 1.40

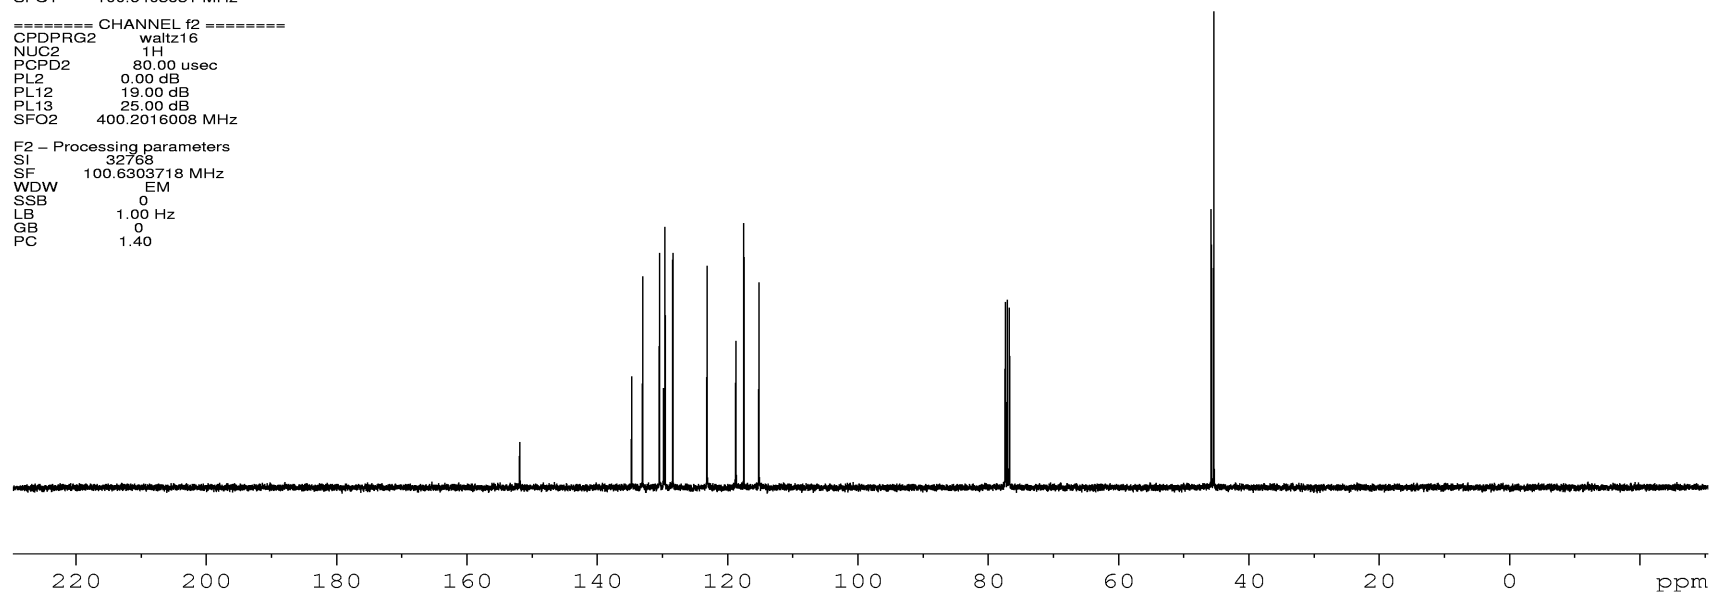

*S*-((5-(Dimethylamino)naphthalen-1-yl)sulfonylaminopropyl) glutathione (**3**)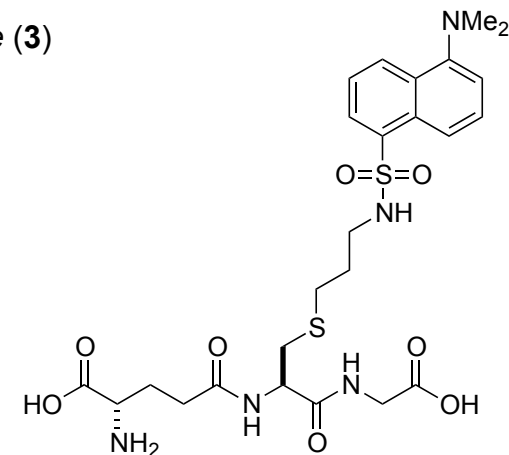

Current Data Parameters  
NAME jh77191902  
EXPNO 1  
PROCNO 1

F2 - Acquisition Parameters  
Date\_ 20100219  
Time 12.38  
INSTRUM drx500  
PROBHD 5 mm PABBO BB/  
PULPROG zg30  
TD 65536  
SOLVENT D2O  
NS 16  
DS 2  
SWH 10330.578 Hz  
FIDRES 0.157632 Hz  
AQ 3.1720407 sec  
RG 181  
DW 48.400 usec  
DE 6.00 usec  
TE 298.1 K  
D1 1.0000000 sec  
TD0 1

===== CHANNEL f1 =====  
NUC1 1H  
P1 12.50 usec  
PL1 0.00 dB  
SFO1 500.1330885 MHz

F2 - Processing parameters  
SI 32768  
SF 500.1300000 MHz  
WDW EM  
SSB 0  
LB 0.30 Hz  
GB 0  
PC 1.00

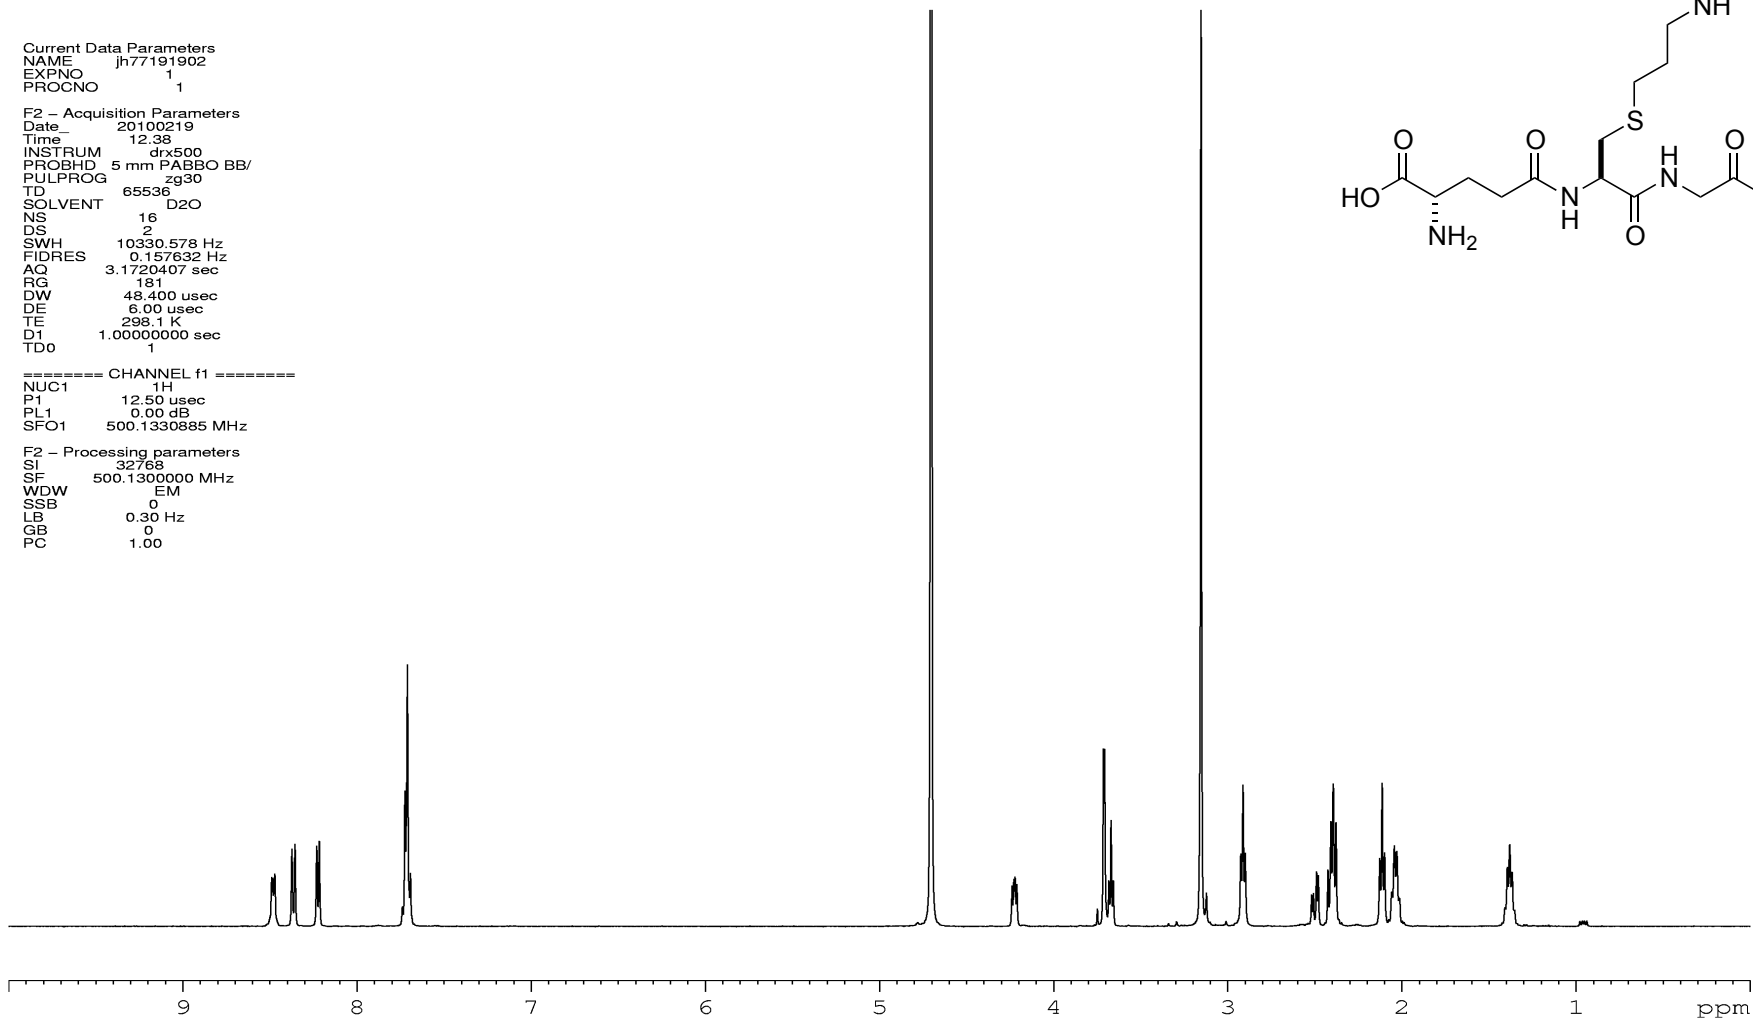

*S*-((5-(Dimethylamino)naphthalen-1-yl)sulfonylaminopropyl) glutathione (**3**)

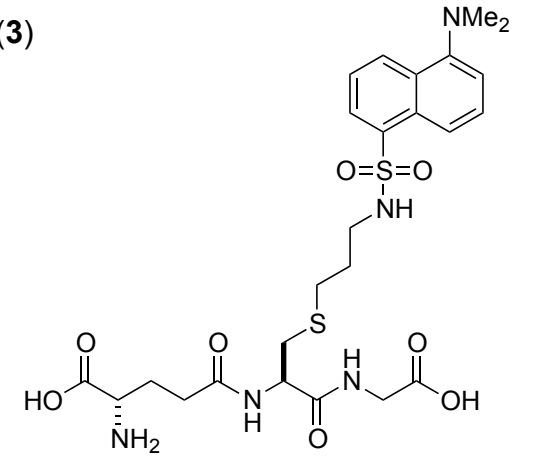

```

Current Data Parameters
NAME      jh77191902
EXPNO     2
PROCNO    1

F2 - Acquisition Parameters
Date_     20100219
Time      14.25
INSTRUM   dpx500
PROBHD    5 mm PABBO BB/
PULPROG   zgpg30
TD        65536
SOLVENT   D2O
NS        2000
DS        4
SWH       30030.029 Hz
FIDRES    0.458222 Hz
AQ        1.0912410 sec
RG        4597.6
DW        16.650 usec
DE        6.00 usec
TE        298.0 K
D1        2.0000000 sec
d11       0.0300000 sec
DELTA     1.89999998 sec
TD0       1

----- CHANNEL f1 -----
NUC1      13C
P1        9.70 usec
PL1       6.00 dB
SFO1     125.7703643 MHz

----- CHANNEL f2 -----
CPDPRG2   waltz16
NUC2      1H
PCPD2     100.00 usec
PL2       0.00 dB
PL12      19.50 dB
PL13      22.50 dB
SFO2     500.1320005 MHz

F2 - Processing parameters
SI        32768
SF        125.7577890 MHz
WDW       EM
SSB       0
LB        1.00 Hz
GB        0
PC        1.40
  
```

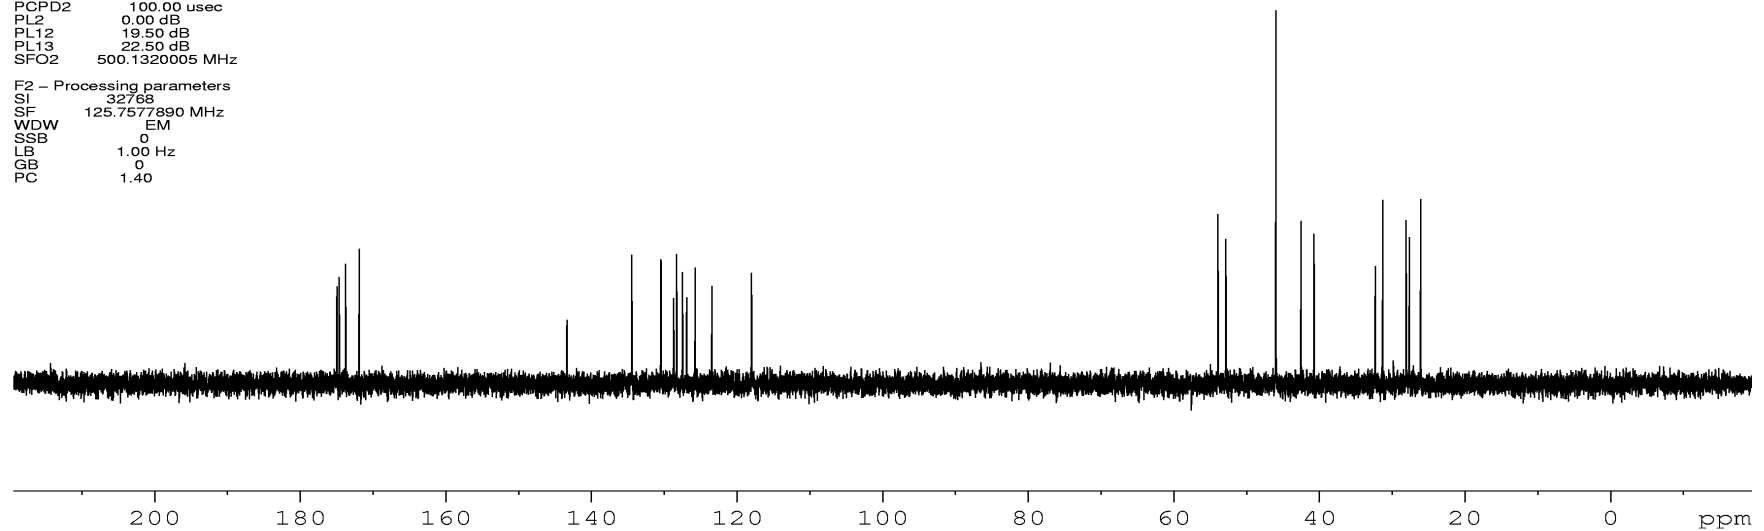

*S*-N-Ethylsuccinimido glutathione (ESG)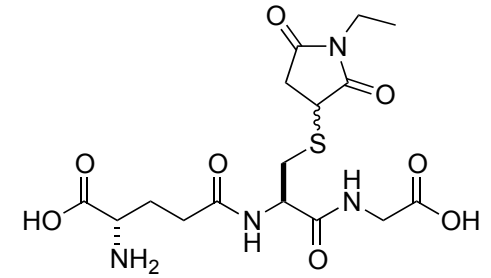

Current Data Parameters  
NAME 01302008-3-jessM  
EXPNO 10  
PROCNO 1

F2 - Acquisition Parameters  
Date\_ 20080130  
Time 15.13  
INSTRUM AVI400  
PROBHD 5 mm PABBO BB-  
PULPROG zg30  
TD 65536  
SOLVENT D2O  
NS 8  
DS 2  
SWH 5597.015 Hz  
FIDRES 0.085404 Hz  
AQ 5.8545995 sec  
RG 287  
DW 89.333 usec  
DE 6.00 usec  
TE 295.7 K  
D1 1.0000000 sec  
TD0 1

===== CHANNEL f1 =====  
NUC1 1H  
P1 12.00 usec  
PL1 -2.00 dB  
PL1W 15.04845142 W  
SFO1 400.1324008 MHz

F2 - Processing parameters  
SI 32768  
SF 400.1300000 MHz  
WDW EM  
SSB 0  
LB 0.30 Hz  
GB 0  
PC 1.00

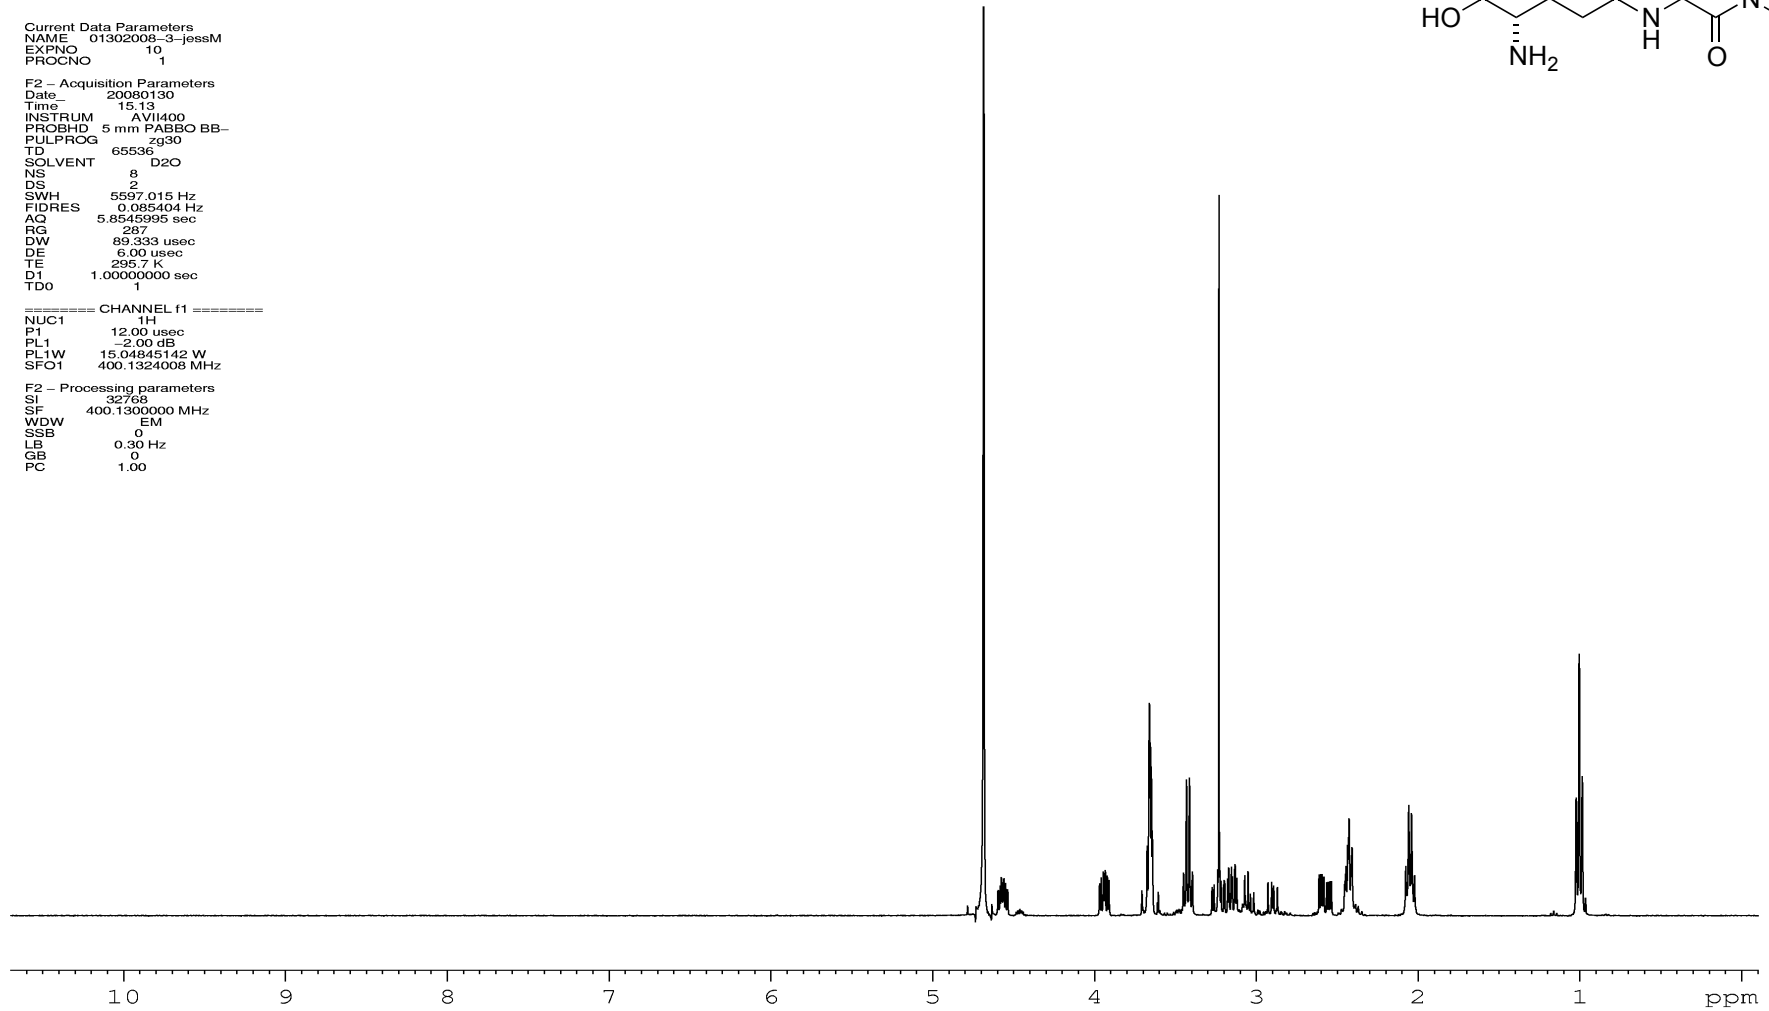

*S*-N-Ethylsuccinimido glutathione (ESG)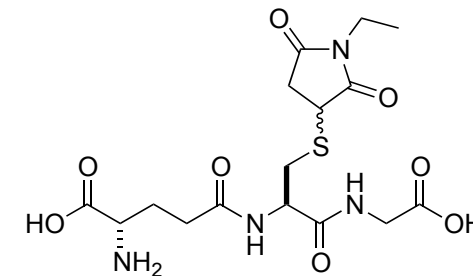

Current Data Parameters  
 NAME 02112008-9-jessM  
 EXPNO 10  
 PROCNO 1

F2 - Acquisition Parameters  
 Date\_ 20080212  
 Time 1.31  
 INSTRUM AVI1400  
 PROBHD 5 mm FABS0 BB-  
 PULPROG deptq135  
 TD 65536  
 SOLVENT D2O  
 NS 1600  
 DS 4  
 SWH 24038.461 Hz  
 FIDRES 0.366798 Hz  
 AQ 1.3631988 sec  
 RG 203  
 DW 20.800 usec  
 DE 6.00 usec  
 TE 298.3 K  
 CNST2 145.0000000  
 D1 2.00000000 sec  
 D2 0.00344828 sec  
 D11 0.03000000 sec

===== CHANNEL f1 =====  
 NUC1 13C  
 P1 8.50 usec  
 P2 17.00 usec  
 PL1 -2.00 dB  
 PL1W 55.73500443 W  
 SFO1 100.6238364 MHz

===== CHANNEL f2 =====  
 CPDPRG2 waltz16  
 NUC2 1H  
 P3 12.00 usec  
 P4 24.00 usec  
 PCPD2 85.00 usec  
 PL2 -2.00 dB  
 PL2W 15.04845142 W  
 PL12W 0.30025607 W  
 SFO2 400.1316005 MHz

F2 - Processing parameters  
 SI 32768  
 SF 100.6127690 MHz  
 WDW EM  
 SSB 0  
 LB 2.00 Hz  
 GB 0  
 PC 1.40

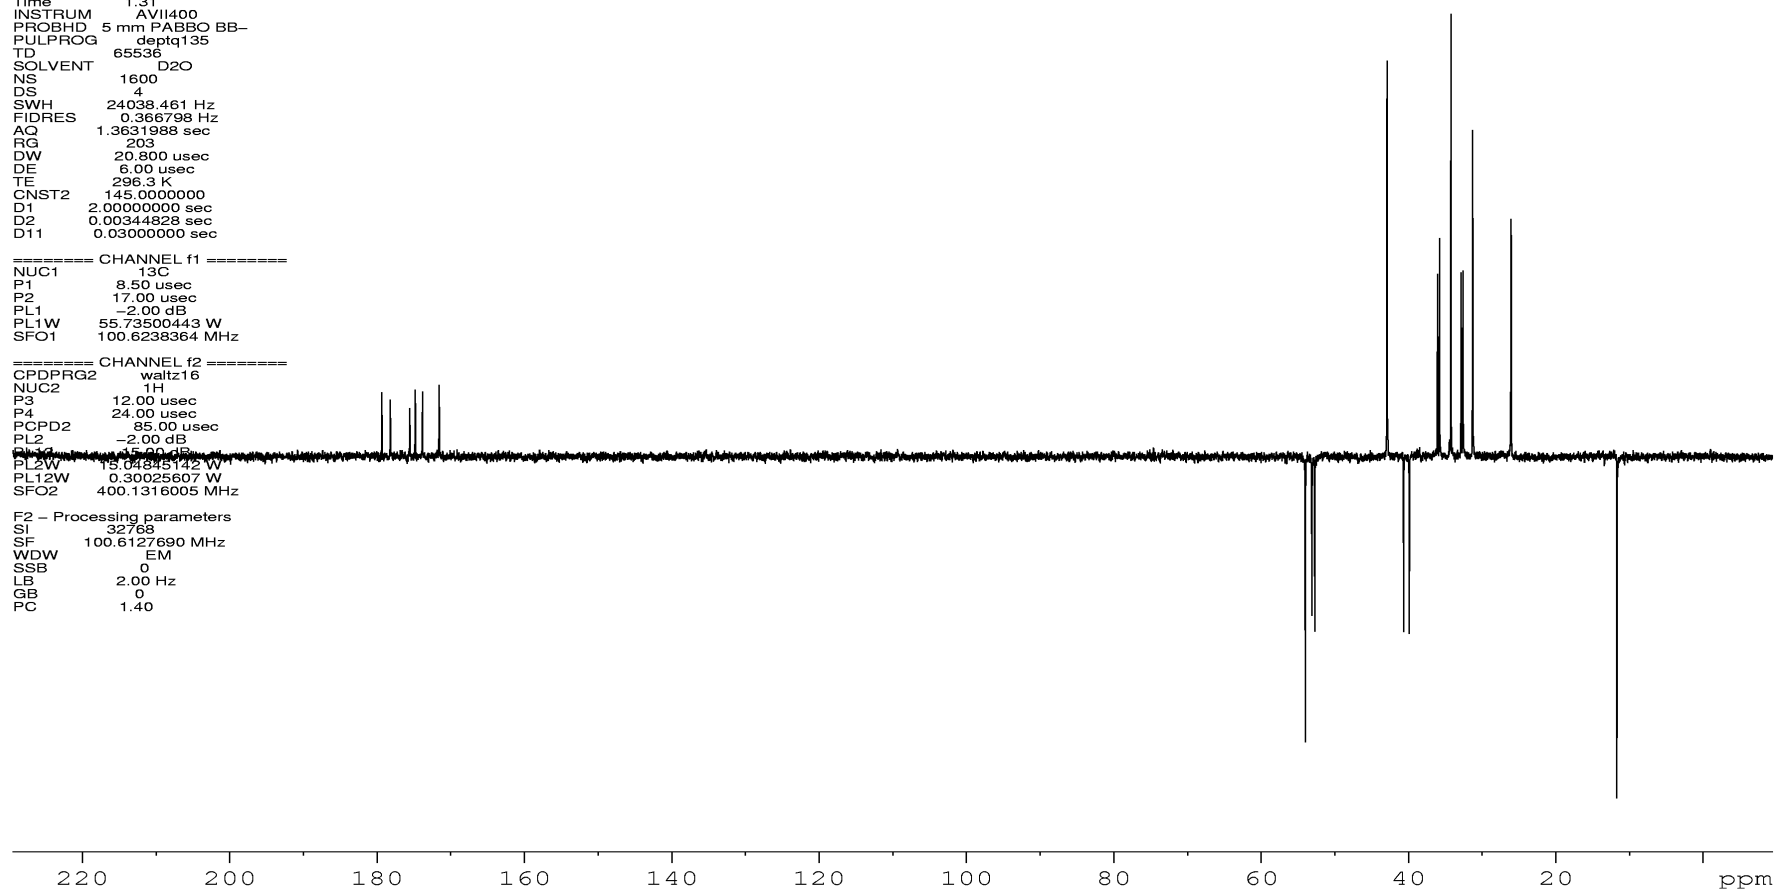

*S-N-Methylsuccinimido glutathione (4)*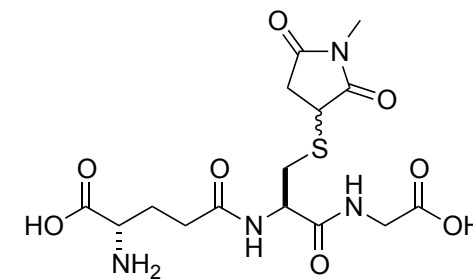

Current Data Parameters  
NAME Oct21-2010-41  
EXPNO 1  
PROCNO 1

F2 - Acquisition Parameters  
Date\_ 20101021  
Time 10.45  
INSTRUM dpx400  
PROBHD 5 mm Dual 1H/1  
PULPROG zg60  
TD 32768  
SOLVENT D2O  
NS 16  
DS 2  
SWH 5592.841 Hz  
FIDRES 0.170680 Hz  
AQ 2.9295092 sec  
RG 645.1  
DW 89.400 usec  
DE 17.00 usec  
TE 300.0 K  
D1 1.00000000 sec

===== CHANNEL f1 =====  
NUC1 1H  
P1 7.30 usec  
PL1 0.00 dB  
SFO1 400.1320007 MHz

F2 - Processing parameters  
SI 32768  
SF 400.1300000 MHz  
WDW no  
SSB 0  
LB 0.00 Hz  
GB 0  
PC 0.60

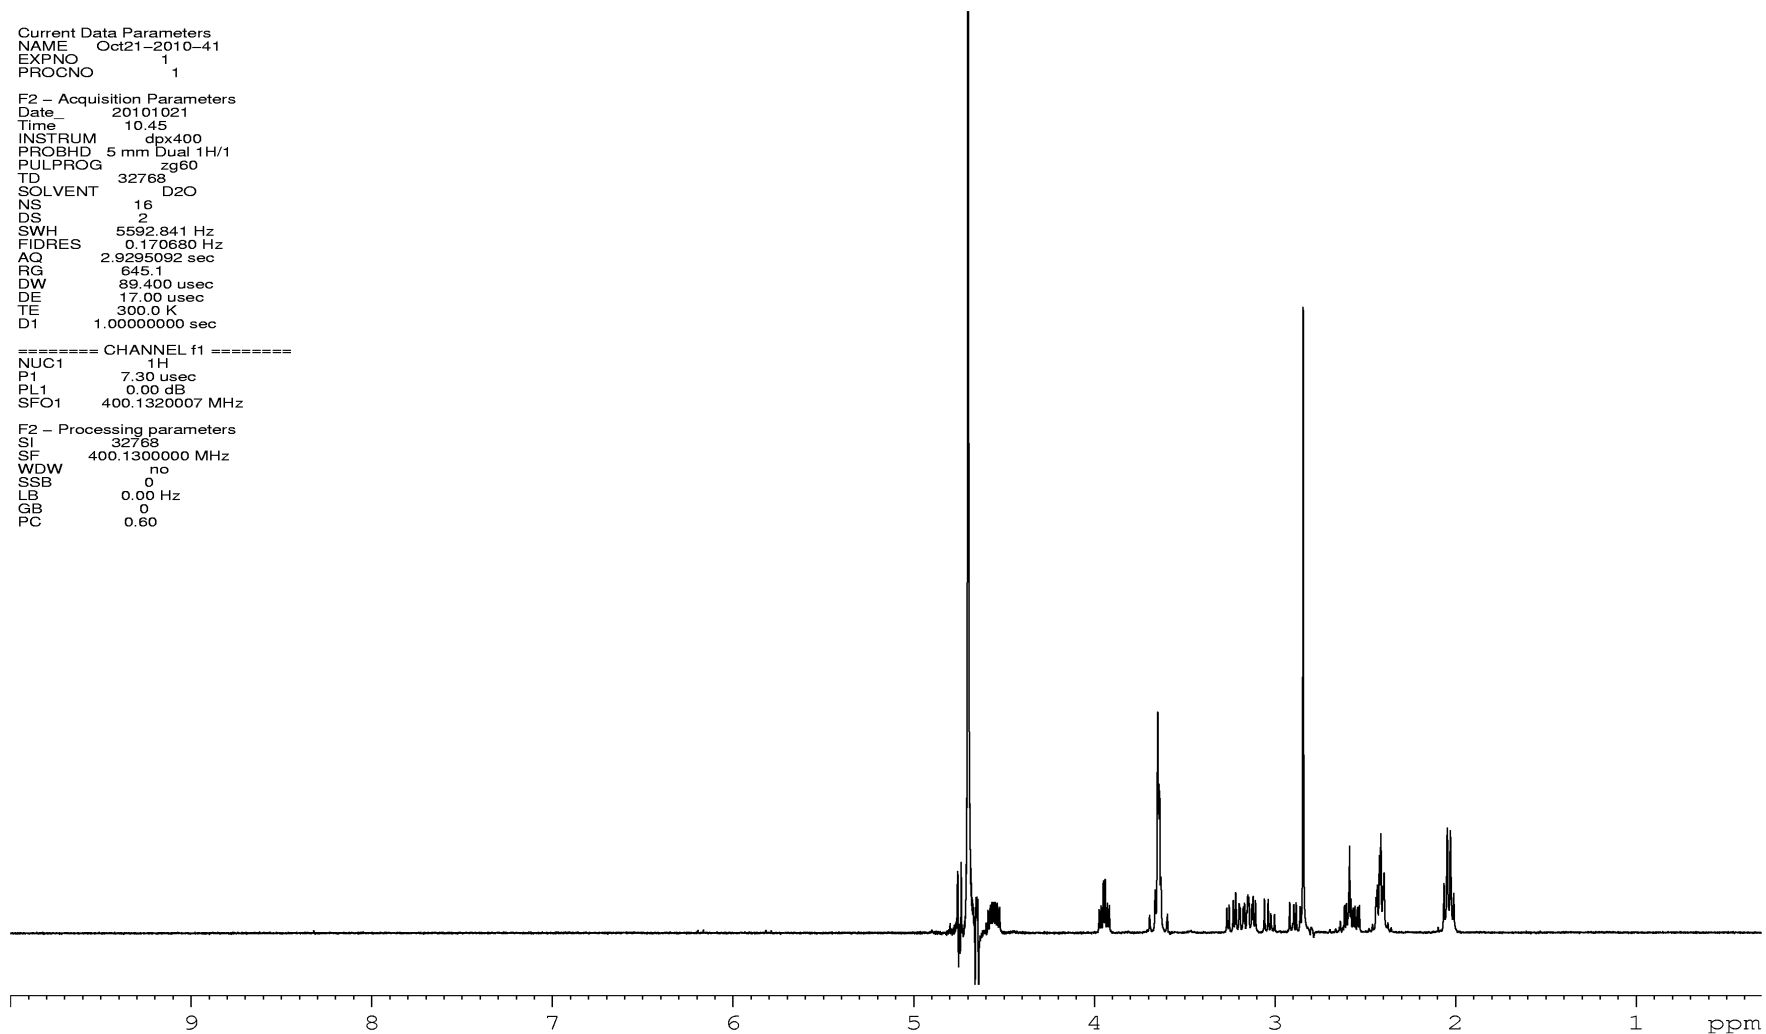



*S-N-Methylsuccinimido glutathione (4)*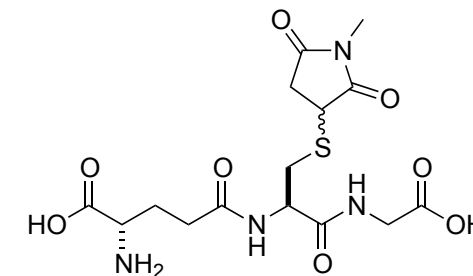

Current Data Parameters  
NAME May21-2013-24  
EXPNO 2  
PROCNO 1

F2 - Acquisition Parameters  
Date\_ 20130522  
Time 4.04  
INSTRUM avn400  
PROBHD 5 mm PABBO BB/  
PULPROG zgpg30  
TD 32768  
SOLVENT D2O  
NS 256  
DS 4  
SWH 26041.666 Hz  
FIDRES 0.794729 Hz  
AQ 0.6291956 sec  
RG 205.43  
DW 19.200 usec  
DE 6.50 usec  
TE 298.0 K  
D1 1.0000000 sec  
D11 0.0300000 sec  
TD0 1

----- CHANNEL f1 -----  
SFO1 100.6530073 MHz  
NUC1 13C  
P1 9.00 usec

F2 - Processing parameters  
SI 32768  
SF 100.6429430 MHz  
WDW EM  
SSB 0  
LB 1.00 Hz  
GB 0  
PC 1.40

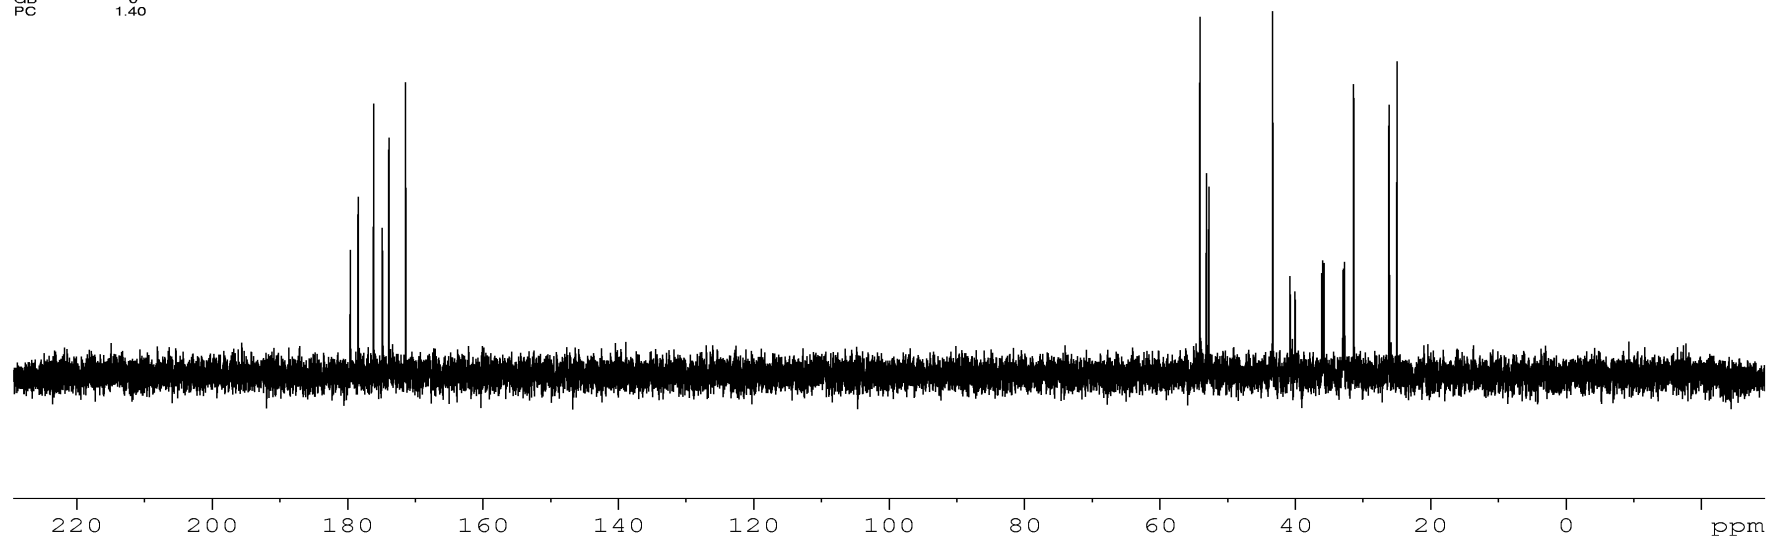

*S*-N-tert-Butylsuccinimido glutathione (5)

Current Data Parameters  
NAME jh41752205  
EXPNO 1  
PROCNO 1  
F2 - Acquisition Parameters  
Date\_ 20130524  
Time\_ 3.18  
INSTRUM avc500  
PROBHD 5 mm CPDUL 13C  
PULPROG zg30  
TD 65536  
SOLVENT D2O  
NS 16  
DS 4  
SWH 10330.578 Hz  
FIDRES 0.157632 Hz  
AQ 3.1719923 sec  
RG 3.2  
DW 48.400 usec  
DE 6.00 usec  
TE 298.0 K  
D1 1.00000000 sec  
TD0 1

----- CHANNEL f1 -----  
NUC1 1H  
P1 10.60 usec  
PL1 6.00 dB  
PL1W 0.95905519 W  
SFO1 500.3030896 MHz

F2 - Processing parameters  
SI 32768  
SF 500.3000000 MHz  
WDW EM  
SSB 0  
LB 0.30 Hz  
GB 0  
PC 1.00

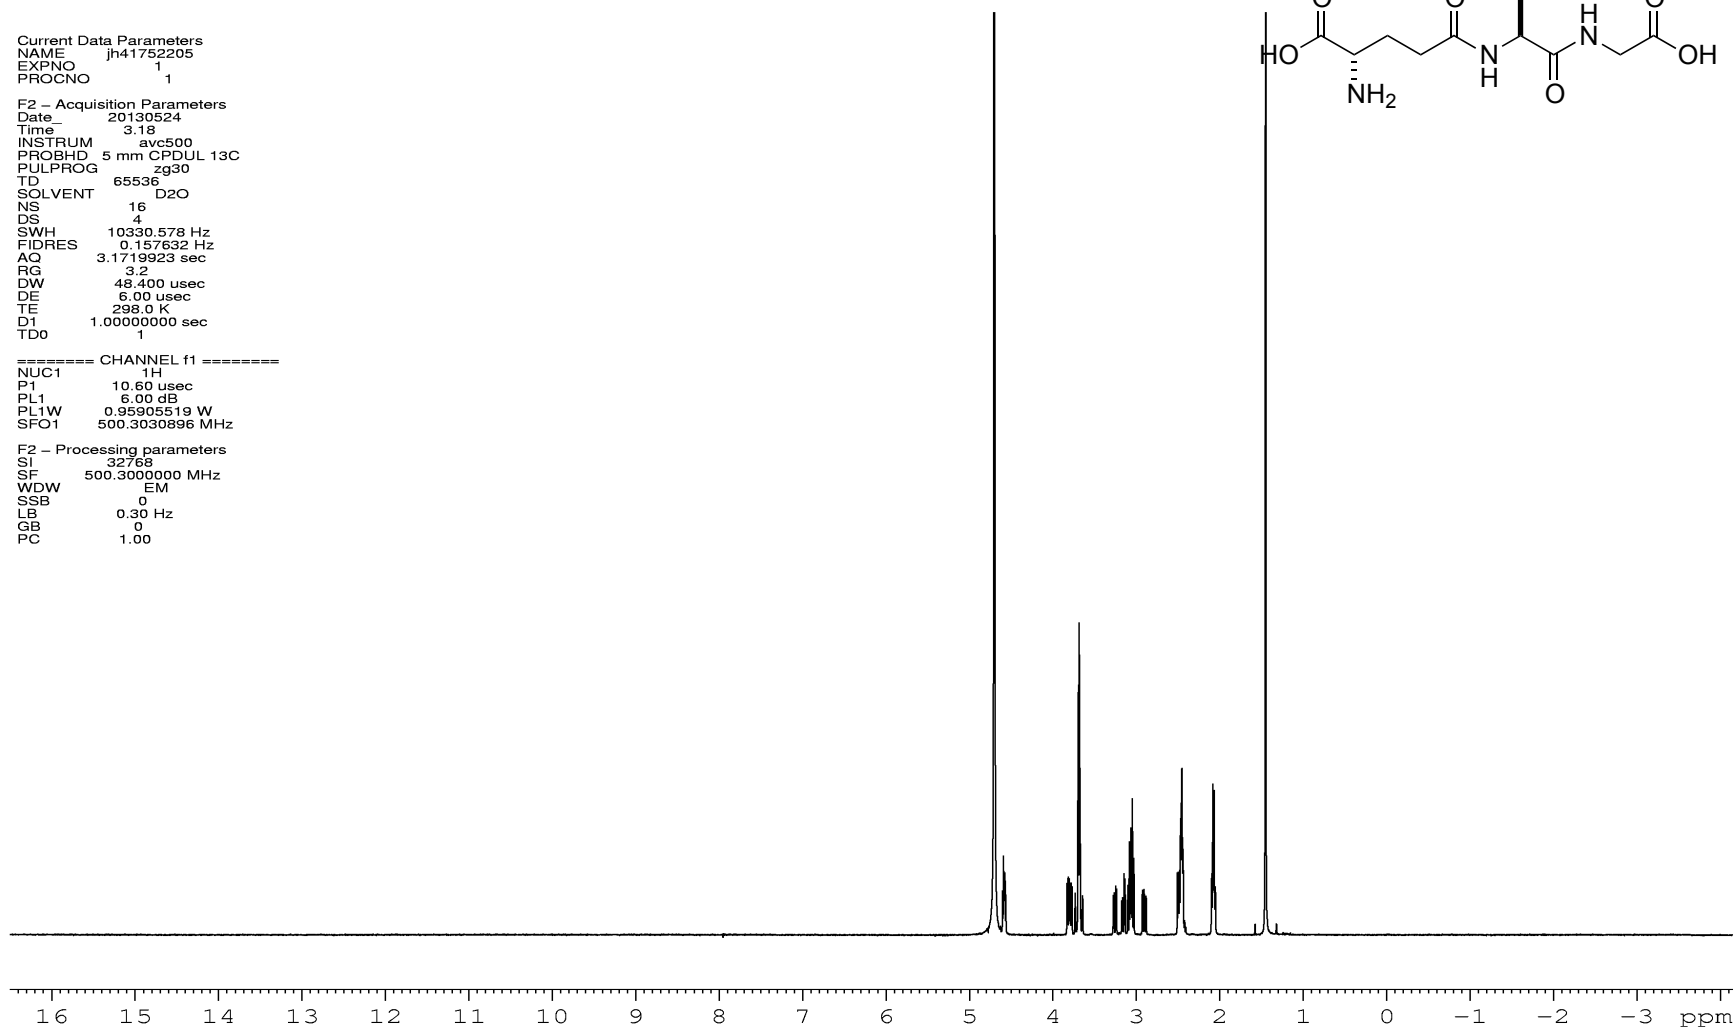

*S-N-tert-Butylsuccinimido glutathione (5)*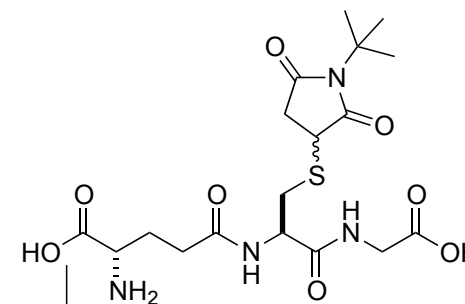

Current Data Parameters  
NAME jh41752205  
EXPNO 2  
PROCNO 1

F2 - Acquisition Parameters  
Date\_ 20130524  
Time 5.05  
INSTRUM avc500  
PROBHD 5 mm CPDUL 13C  
PULPROG zgpg30  
TD 65536  
SOLVENT D2O  
NS 2048  
DS 2  
SWH 31250.000 Hz  
FIDRES 0.476837 Hz  
AQ 1.0486259 sec  
RG 912  
DW 16.000 usec  
DE 20.00 usec  
TE 298.0 K  
D1 2.00000000 sec  
D11 0.03000000 sec  
TD0 1

----- CHANNEL f1 -----  
NUC1 13C  
P1 10.25 usec  
PL1 8.00 dB  
PL1W 1.62029624 W  
SFO1 125.8131151 MHz

----- CHANNEL f2 -----  
CPDPRG2 waltz16  
NUC2 1H  
PCPD2 80.00 usec  
PL2 6.00 dB  
PL12 23.56 dB  
PL13 29.56 dB  
PL2W 0.95905519 W  
PL12W 0.01682068 W  
PL13W 0.00422516 W  
SFO2 500.3020012 MHz

F2 - Processing parameters  
SI 32768  
SF 125.8005350 MHz  
WDW EM  
SSB 0  
LB 1.00 Hz  
GB 0  
PC 1.40

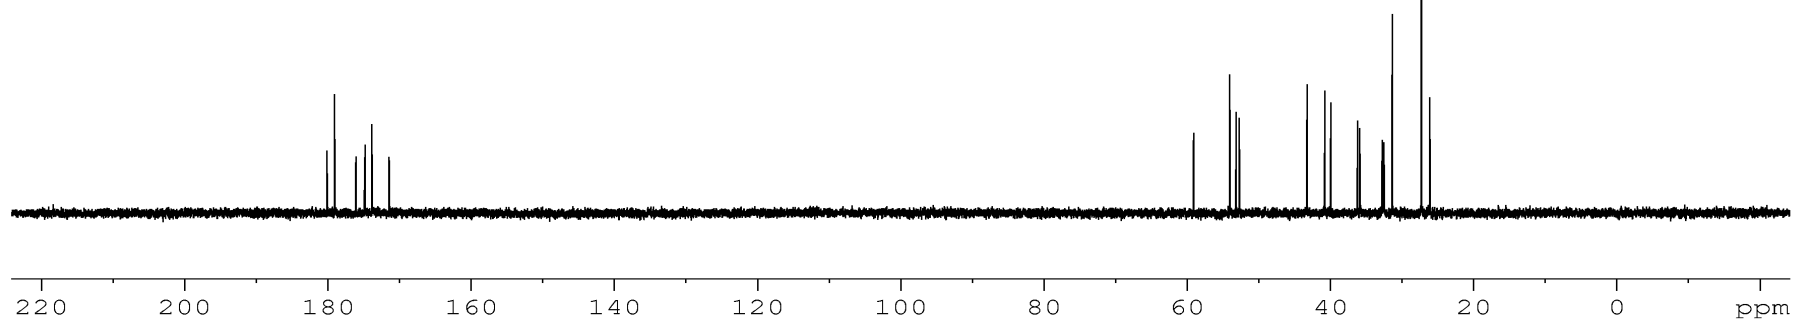

*S-N-Benzylsuccinimido glutathione (6)*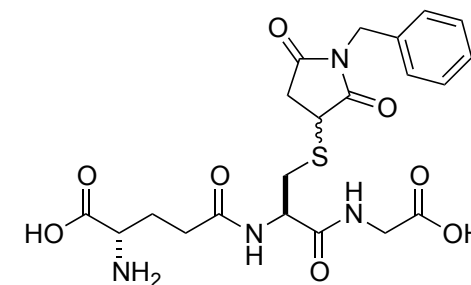

Current Data Parameters  
NAME Oct27-2010-17  
EXPNO 1  
PROCNO 1

F2 - Acquisition Parameters  
Date\_ 20101027  
Time 10.11  
INSTRUM av400  
PROBHD 5 mm QNP 1H/13  
PULPROG zg60  
TD 65536  
SOLVENT D2O  
NS 16  
DS 2  
SWH 8278.146 Hz  
FIDRES 0.126314 Hz  
AQ 3.9584243 sec  
RG 90.5  
DW 60.400 usec  
DE 7.50 usec  
TE 300.0 K  
D1 1.0000000 sec

----- CHANNEL f1 -----  
NUC1 1H  
P1 9.00 usec  
PL1 0.00 dB  
SFO1 400.2024714 MHz

F2 - Processing parameters  
SI 32768  
SF 400.2000000 MHz  
WDW no  
SSB 0  
LB 0.00 Hz  
GB 0  
PC 1.00

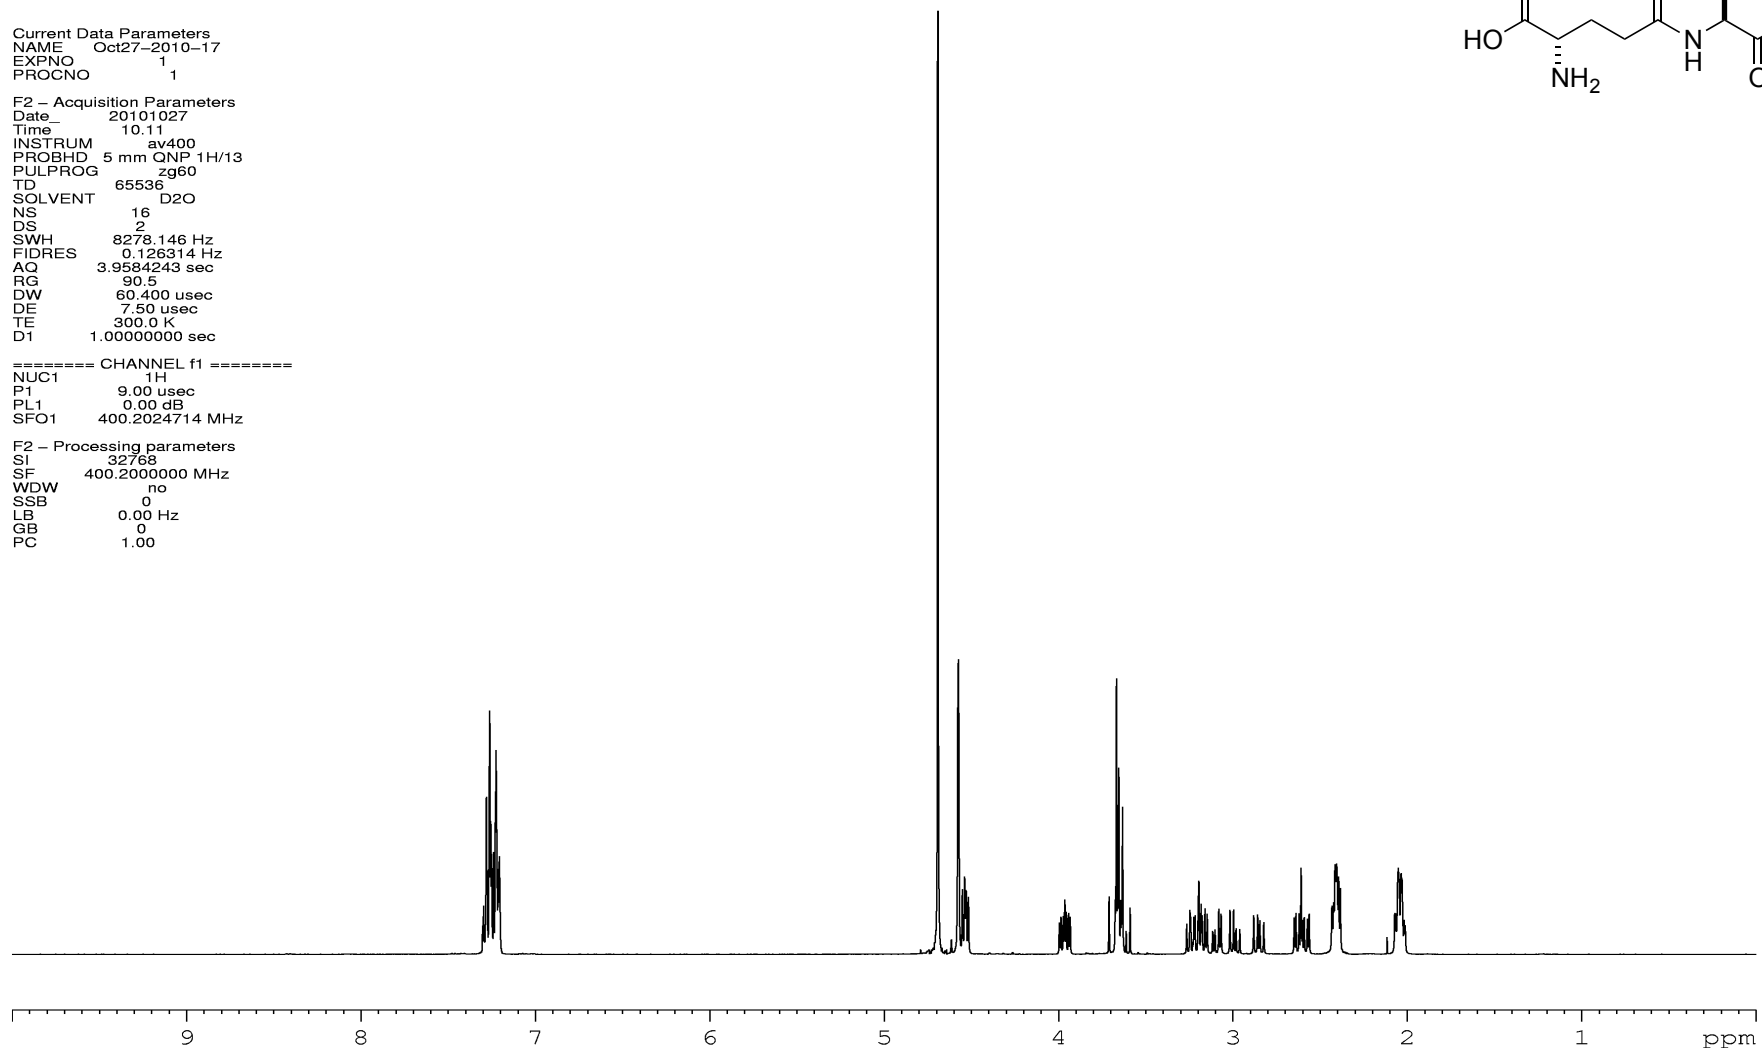

*S*-N-Benzylsuccinimido glutathione (6)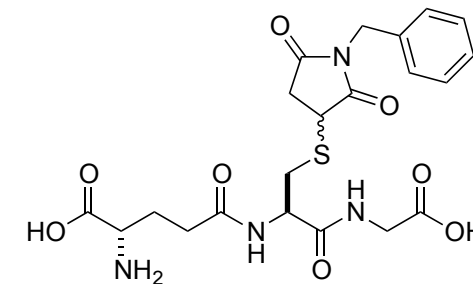

Current Data Parameters  
NAME Oct27-2010-17  
EXPNO 2  
PROCNO 1

F2 - Acquisition Parameters  
Date\_ 20101027  
Time 10.19  
INSTRUM av400  
PROBHD 5 mm QNP 1H/13  
PULPROG zgpg30  
TD 32768  
SOLVENT D2O  
NS 256  
DS 4  
SWH 26178.010 Hz  
FIDRES 0.798889 Hz  
AQ 0.6259188 sec  
RG 32768  
DW 19.100 usec  
DE 7.50 usec  
TE 300.0 K  
D1 1.0000000 sec  
D11 0.0300000 sec  
TD0 1

===== CHANNEL f1 =====  
NUC1 13C  
P1 9.50 usec  
PL1 0.00 dB  
SFO1 100.6403931 MHz

===== CHANNEL f2 =====  
CPDPRG2 waltz16  
NUC2 1H  
PCPD2 80.00 usec  
PL2 0.00 dB  
PL12 19.00 dB  
PL13 25.00 dB  
SFO2 400.2016008 MHz

F2 - Processing parameters  
SI 32768  
SF 100.6303300 MHz  
WDW no  
SSB 0  
LB 0.00 Hz  
GB 0  
PC 1.40

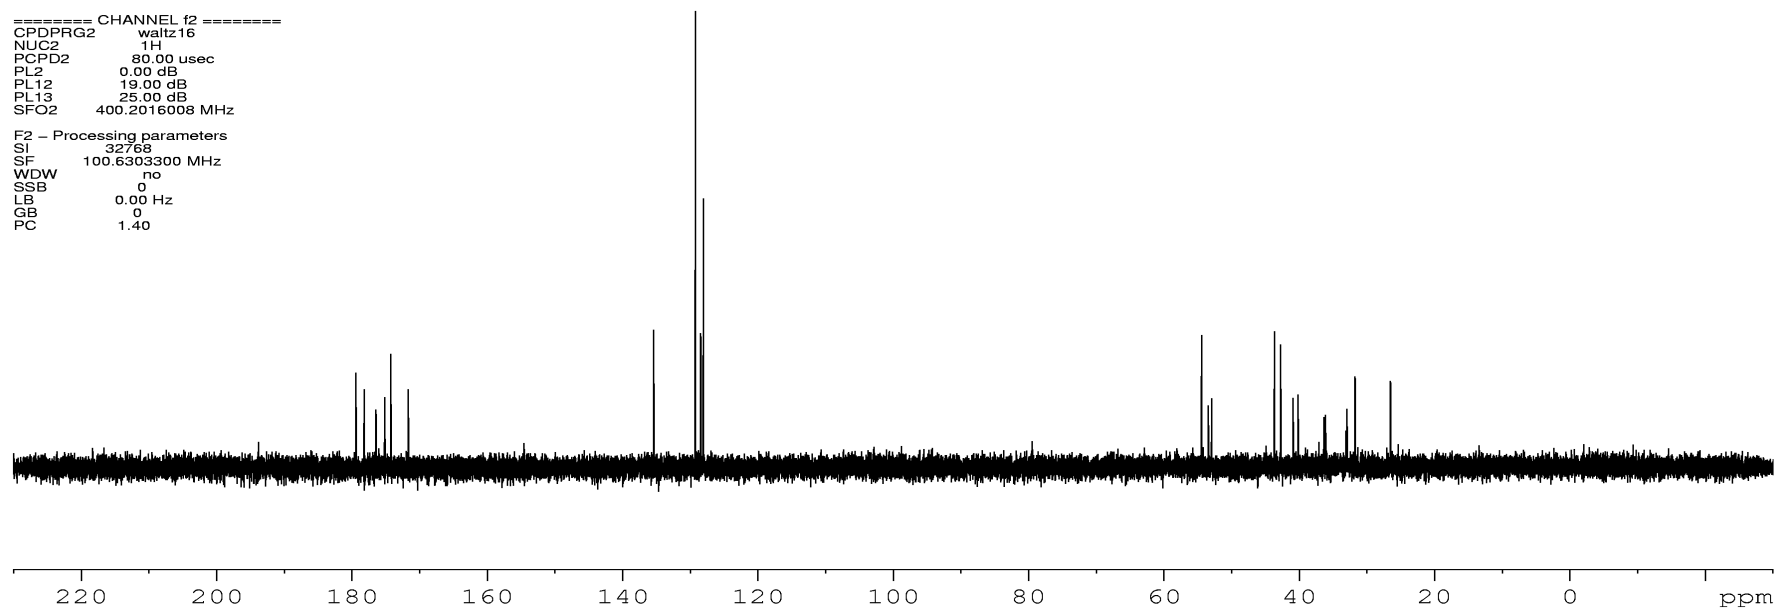

*S*-N-Cyclohexylsuccinimido glutathione (7)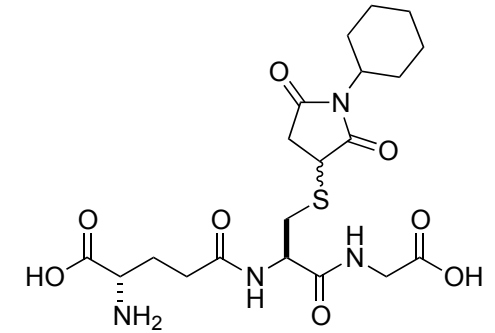

Current Data Parameters  
NAME Oct27-2010-18  
EXPNO 1  
PROCNO 1

F2 - Acquisition Parameters  
Date\_ 20101027  
Time\_ 10.36  
INSTRUM av400  
PROBHD 5 mm QNP 1H/13  
PULPROG zgpg0  
TD 65536  
SOLVENT D2O  
NS 16  
DS 2  
SWH 8278.146 Hz  
FIDRES 0.126314 Hz  
AQ 3.9584243 sec  
RG 90.5  
DW 60.400 usec  
DE 7.50 usec  
TE 300.0 K  
D1 1.0000000 sec

===== CHANNEL f1 =====  
NUC1 1H  
P1 9.00 usec  
PL1 0.00 dB  
SFO1 400.2024714 MHz

F2 - Processing parameters  
SI 32768  
SF 400.2000000 MHz  
WDW no  
SSB 0  
LB 0.00 Hz  
GB 0  
PC 1.00

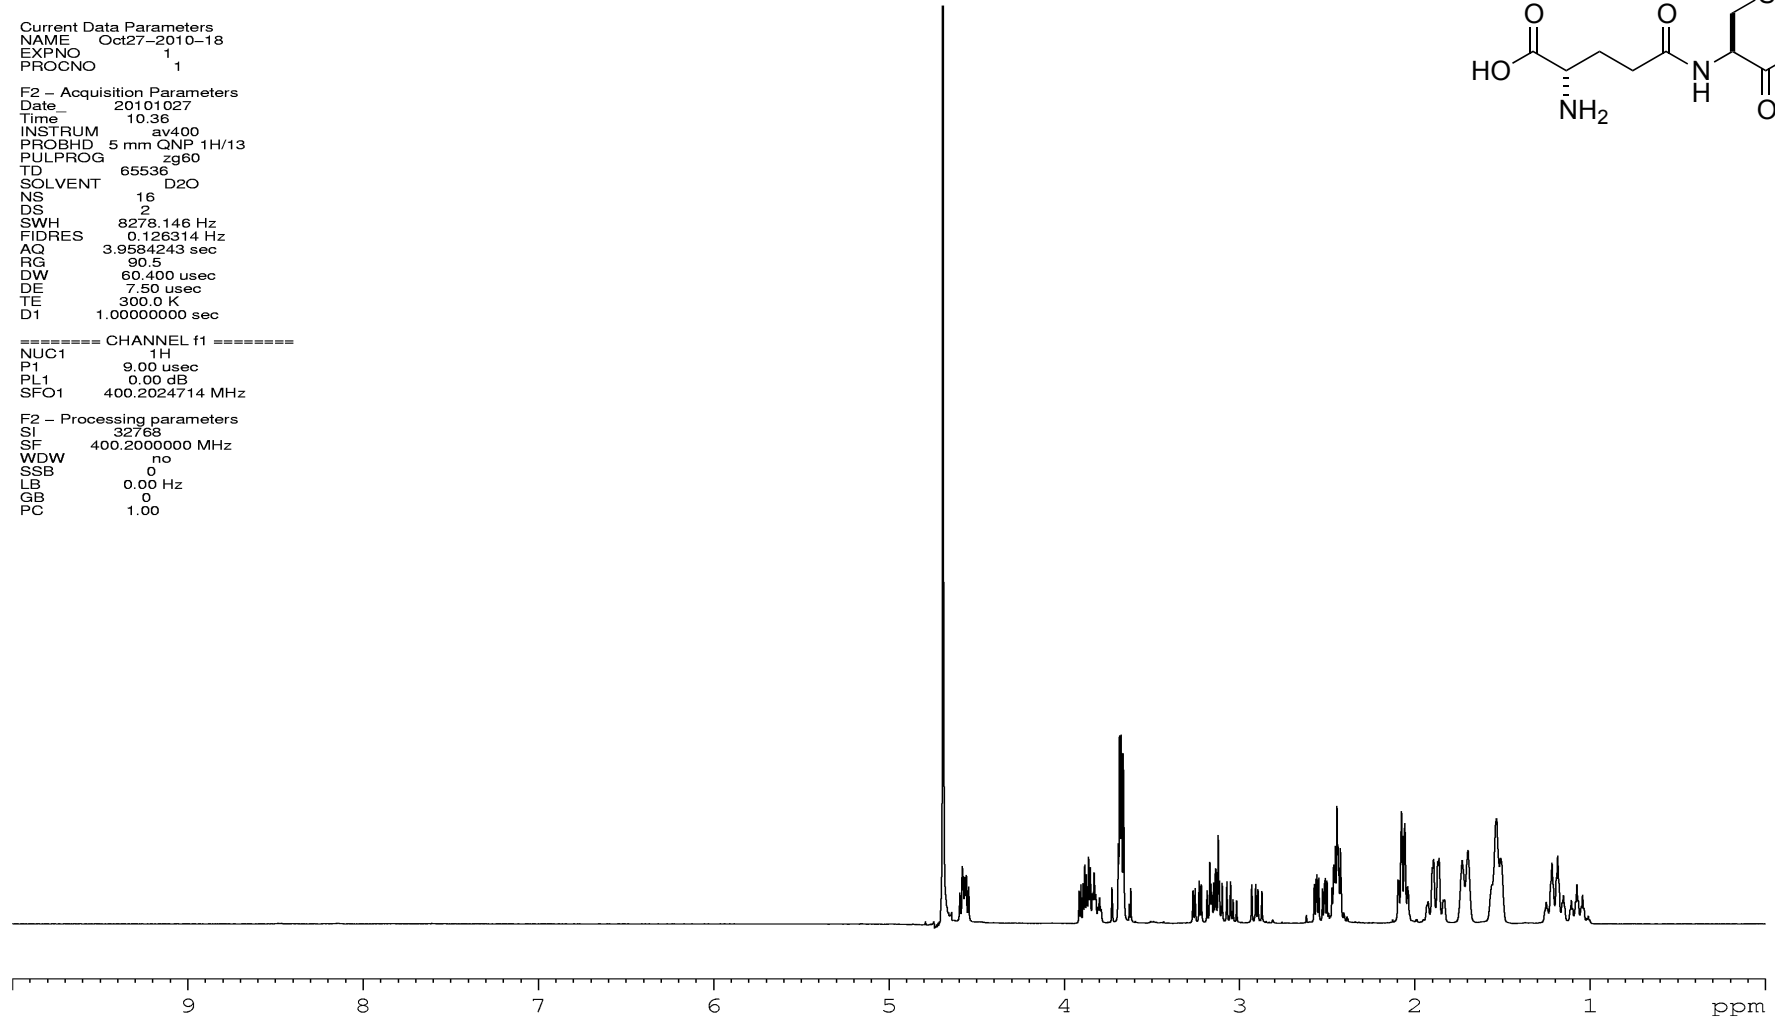

*S-N-Cyclohexylsuccinimido glutathione (7)*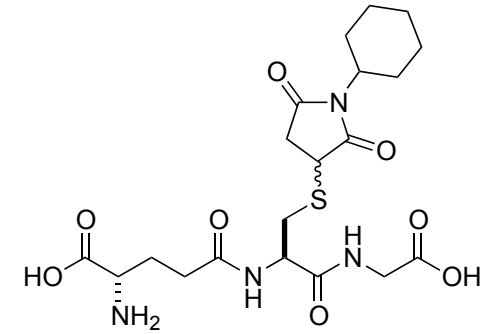

Current Data Parameters  
NAME Oct27-2010-18  
EXPNO 2  
PROCNO 1

F2 - Acquisition Parameters  
Date\_ 20101027  
Time 10.44  
INSTRUM av400  
PROBHD 5 mm QNP 1H/13  
PULPROG zgpg30  
TD 32768  
SOLVENT D2O  
NS 256  
DS 4  
SWH 26178.010 Hz  
FIDRES 0.798889 Hz  
AQ 0.6259188 sec  
RG 32768  
DW 19.100 usec  
DE 7.50 usec  
TE 300.0 K  
D1 1.0000000 sec  
D11 0.0300000 sec  
TD0 1

===== CHANNEL f1 =====  
NUC1 13C  
P1 9.50 usec  
PL1 0.00 dB  
SFO1 100.6403931 MHz

===== CHANNEL f2 =====  
CPDPRG2 waltz16  
NUC2 1H  
PCPD2 80.00 usec  
PL2 0.00 dB  
PL12 19.00 dB  
PL13 25.00 dB  
SFO2 400.2016008 MHz

F2 - Processing parameters  
SI 32768  
SF 100.6303300 MHz  
WDW no  
SSB 0  
LB 0.00 Hz  
GB 0  
PC 1.40

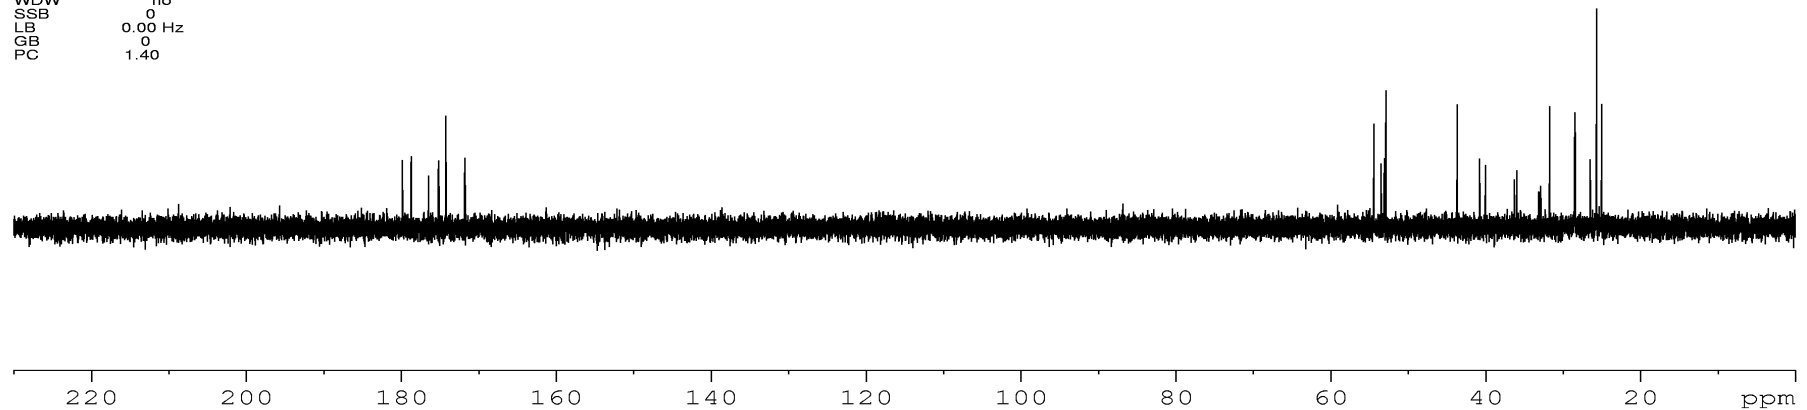

*S*-Cyclopentan-2,4-dion-1-yl glutathione (**8**)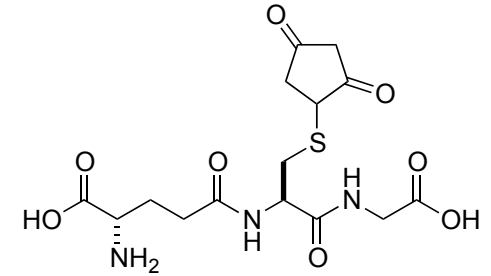

Current Data Parameters  
NAME May31-2013-5  
EXPNO 1  
PROCNO 1

F2 - Acquisition Parameters  
Date\_ 20130531  
Time 16.32  
INSTRUM av400  
PROBHD 5 mm QNP 1H/13  
PULPROG zg60  
TD 65536  
SOLVENT D2O  
NS 16  
DS 2  
SWH 8278.146 Hz  
FIDRES 0.126314 Hz  
AQ 3.9584243 sec  
RG 181  
DW 60.400 usec  
DE 7.50 usec  
TE 300.0 K  
D1 1.00000000 sec

===== CHANNEL f1 =====  
NUC1 1H  
P1 10.10 usec  
PL1 0.00 dB  
SFO1 400.2024714 MHz

F2 - Processing parameters  
SI 32768  
SF 400.2000000 MHz  
WDW EM  
SSB 0  
LB 0.30 Hz  
GB 0  
PC 1.00

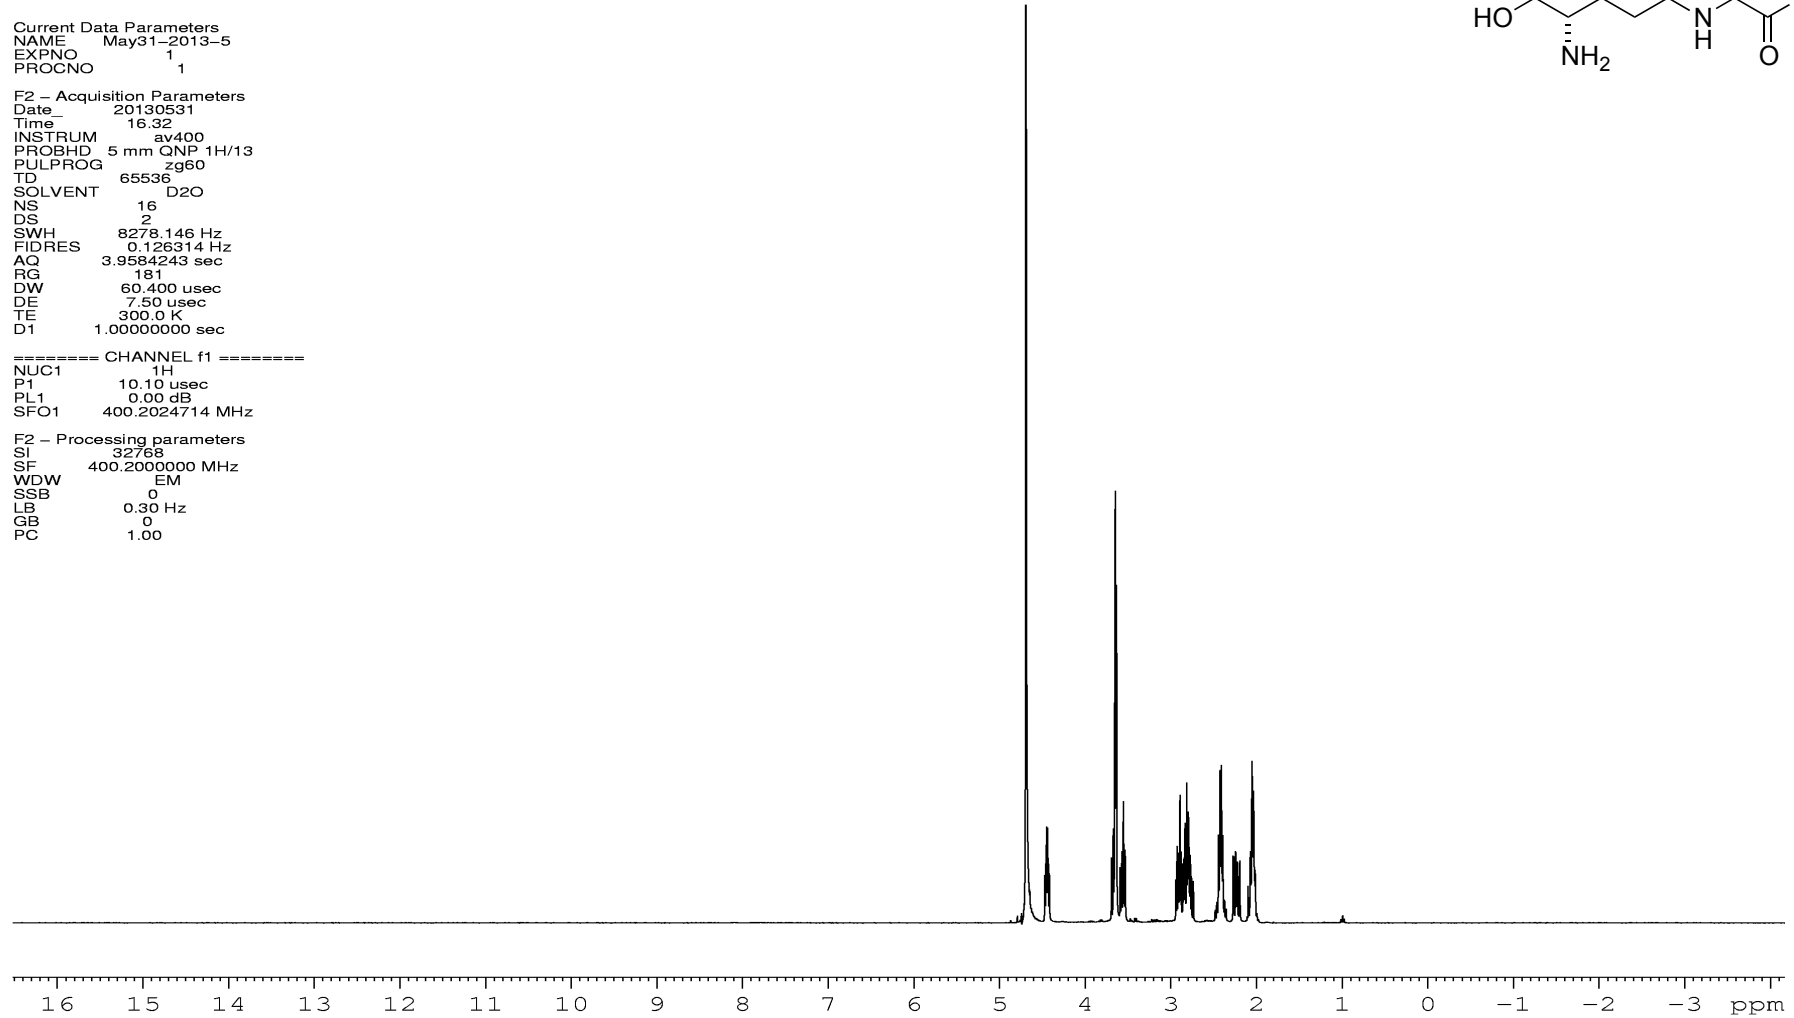



*S*-Cyclopentan-2,4-dion-1-yl glutathione (**8**)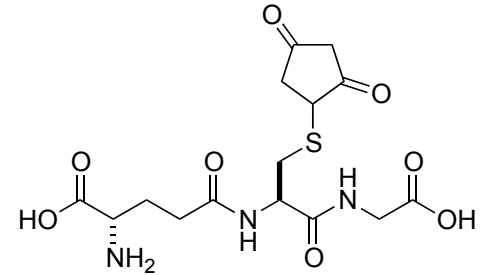

```

Current Data Parameters
NAME      jh43140306
EXPNO     1
PROCNO    1

F2 - Acquisition Parameters
Date_     20130604
Time      9.54
INSTRUM   avc500
PROBHD    5 mm CPDUL 13C
PULPROG   zgpg30
TD         65536
SOLVENT   D2O
NS         1024
DS         2
SWH        31250.000 Hz
FIDRES     0.476837 Hz
AQ         1.0486259 sec
RG         912
DW         16.000 usec
DE         20.00 usec
TE         298.0 K
D1         2.00000000 sec
D11        0.03000000 sec
TD0        1

===== CHANNEL f1 =====
NUC1       13C
P1         10.25 usec
PL1        8.00 dB
PL1W       1.62029624 W
SFO1       125.8131151 MHz

===== CHANNEL f2 =====
CPDPRG2    waltz16
NUC2       1H
PCPD2      80.00 usec
PL2        6.00 dB
PL12       23.56 dB
PL13       29.56 dB
PL2W       0.95905519 W
PL12W      0.01682068 W
PL13W      0.00422516 W
SFO2       500.3020012 MHz

F2 - Processing parameters
SI         32768
SF         125.8005350 MHz
WDW        EM
SSB        0
LB         1.00 Hz
GB         0
PC         1.40

```

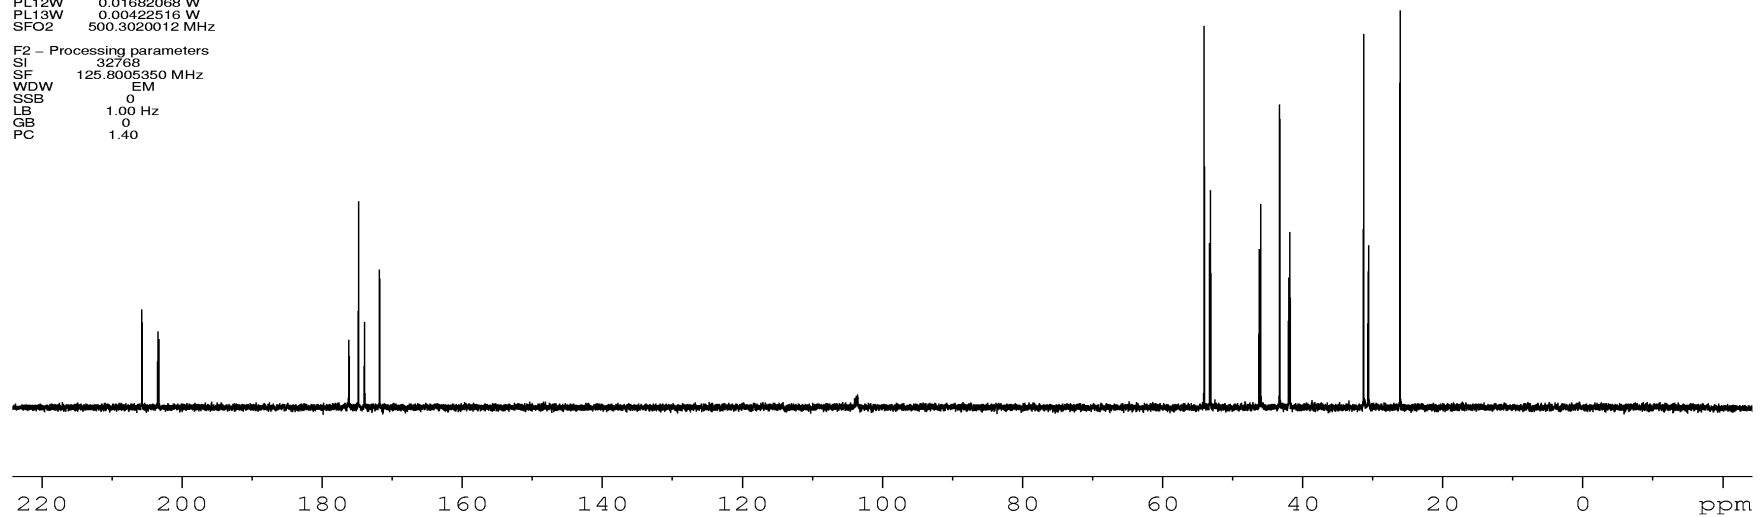

*S*-Pentan-3-on-1-yl glutathione (10)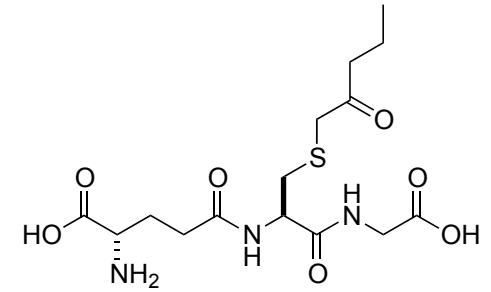

Current Data Parameters  
NAME jh12971111  
EXPNO 4  
PROCNO 1

F2 - Acquisition Parameters  
Date\_ 20101112  
Time 10.37  
INSTRUM avc500  
PROBHD 5 mm CPDUL 13C  
PULPROG zg30  
TD 65536  
SOLVENT D2O  
NS 16  
DS 2  
SWH 10330.578 Hz  
FIDRES 0.157632 Hz  
AQ 3.1719923 sec  
RG 4  
DW 48.400 usec  
DE 6.00 usec  
TE 298.0 K  
D1 1.0000000 sec  
TD0 1

==== CHANNEL f1 =====  
NUC1 1H  
P1 9.60 usec  
PL1 -6.00 dB  
PL1W 15.1999981 W  
SFO1 500.3030896 MHz

F2 - Processing parameters  
SI 32768  
SF 500.3000000 MHz  
WDW EM  
SSB 0  
LB 0.30 Hz  
GB 0  
PC 1.00

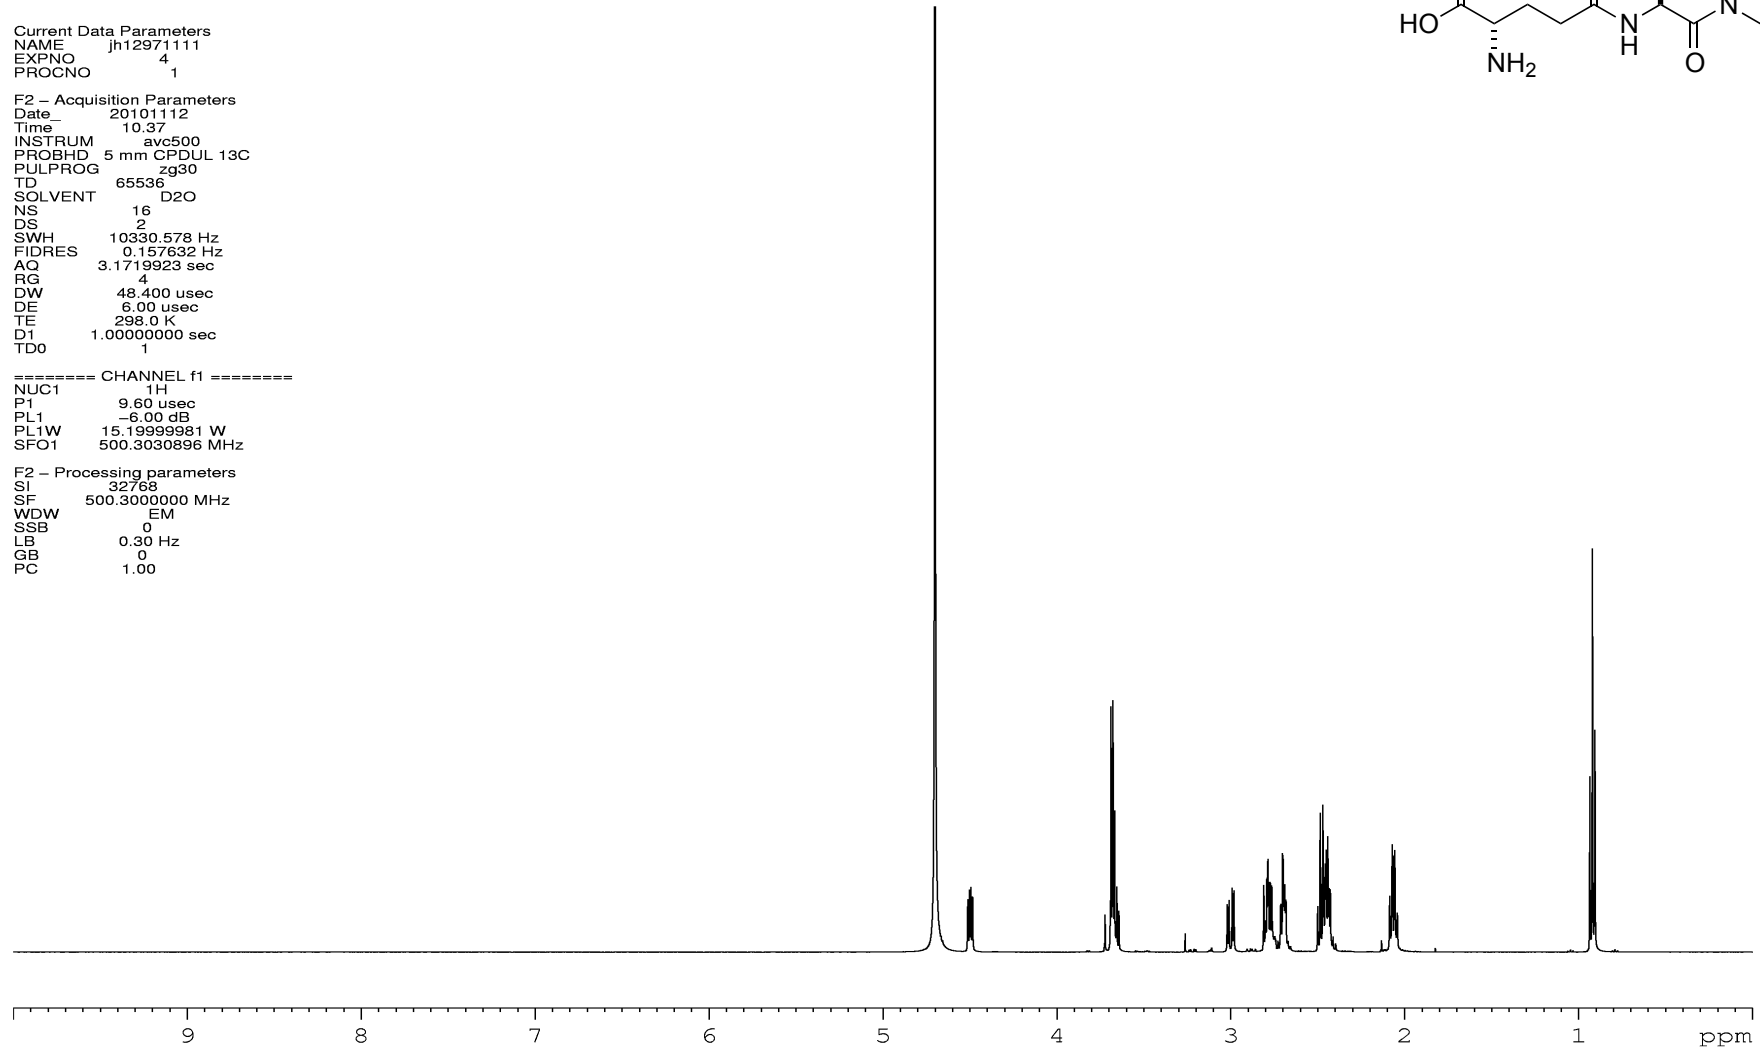

*S*-Pentan-3-on-1-yl glutathione (10)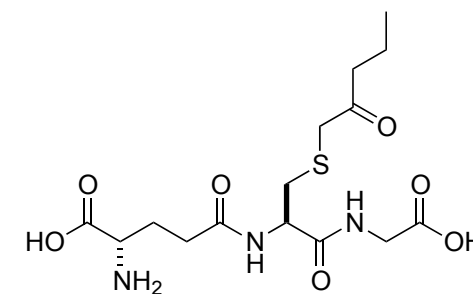

Current Data Parameters  
NAME jh12971111  
EXPNO 6  
PROCNO 1

F2 - Acquisition Parameters  
Date\_ 20101112  
Time 11.42  
INSTRUM avc500  
PROBHD 5 mm CPDUL 13C  
PULPROG zgpg30  
TD 65536  
SOLVENT D2O  
NS 1024  
DS 2  
SWH 31250.000 Hz  
FIDRES 0.476837 Hz  
AQ 1.0486259 sec  
RG 1820  
DW 16.000 usec  
DE 20.00 usec  
TE 298.0 K  
D1 2.00000000 sec  
D11 0.03000000 sec  
TD0 1

===== CHANNEL f1 =====  
NUC1 13C  
P1 9.50 usec  
PL1 -4.40 dB  
PL1W 28.15752029 W  
SFO1 125.8131151 MHz

===== CHANNEL f2 =====  
CPDPRG2 waltz16  
NUC2 1H  
PCPD2 80.00 usec  
PL2 -6.00 dB  
PL12 12.42 dB  
PL13 18.42 dB  
PL2W 15.19999981 W  
PL12W 0.21869738 W  
PL13W 0.05493430 W  
SFO2 500.3020012 MHz

F2 - Processing parameters  
SI 32768  
SF 125.8005350 MHz  
WDW EM  
SSB 0  
LB 1.00 Hz  
GB 0  
PC 1.40

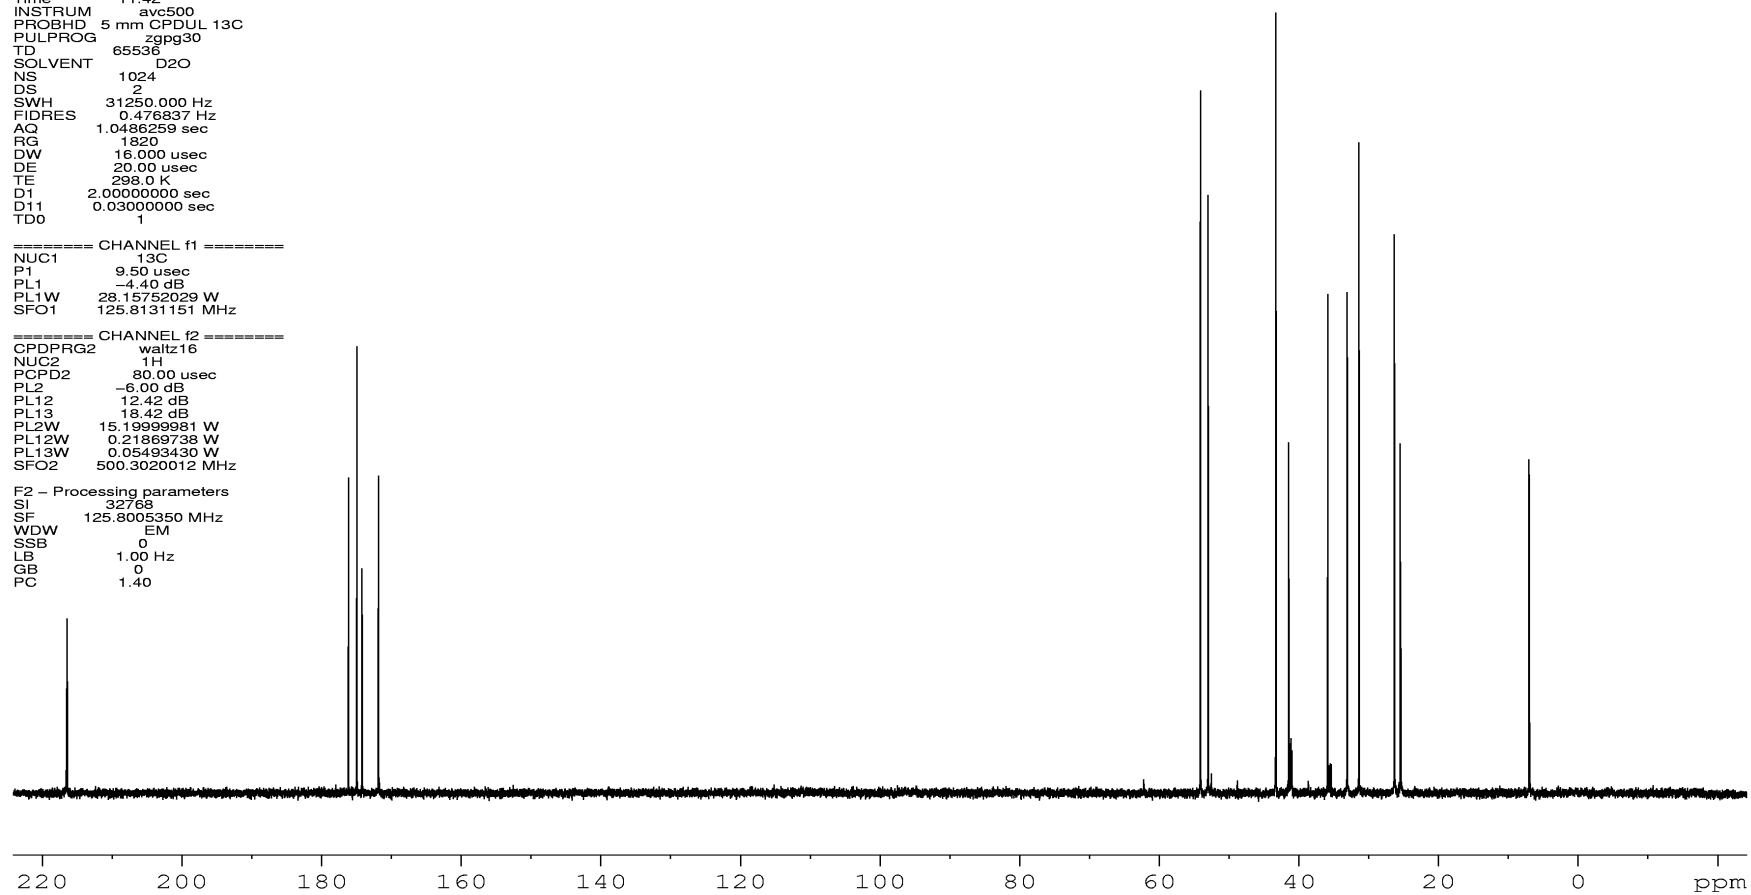

*S*-Hexan-3-on-1-yl glutathione (11)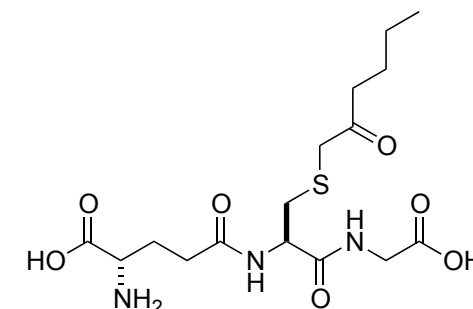

Current Data Parameters  
NAME Nov05-2010-51  
EXPNO 2  
PROCNO 1

F2 - Acquisition Parameters  
Date\_ 20101105  
Time 17.47  
INSTRUM dpx400  
PROBHD 5 mm Dual 1H/1  
PULPROG zg60  
TD 32768  
SOLVENT D2O  
NS 16  
DS 2  
SWH 5592.841 Hz  
FIDRES 0.170680 Hz  
AQ 2.9295092 sec  
RG 256  
DW 89.400 usec  
DE 17.00 usec  
TE 300.0 K  
D1 1.00000000 sec

===== CHANNEL f1 =====  
NUC1 1H  
P1 7.30 usec  
PL1 0.00 dB  
SFO1 400.1320007 MHz

F2 - Processing parameters  
SI 32768  
SF 400.1300000 MHz  
WDW no  
SSB 0  
LB 0.00 Hz  
GB 0  
PC 0.60

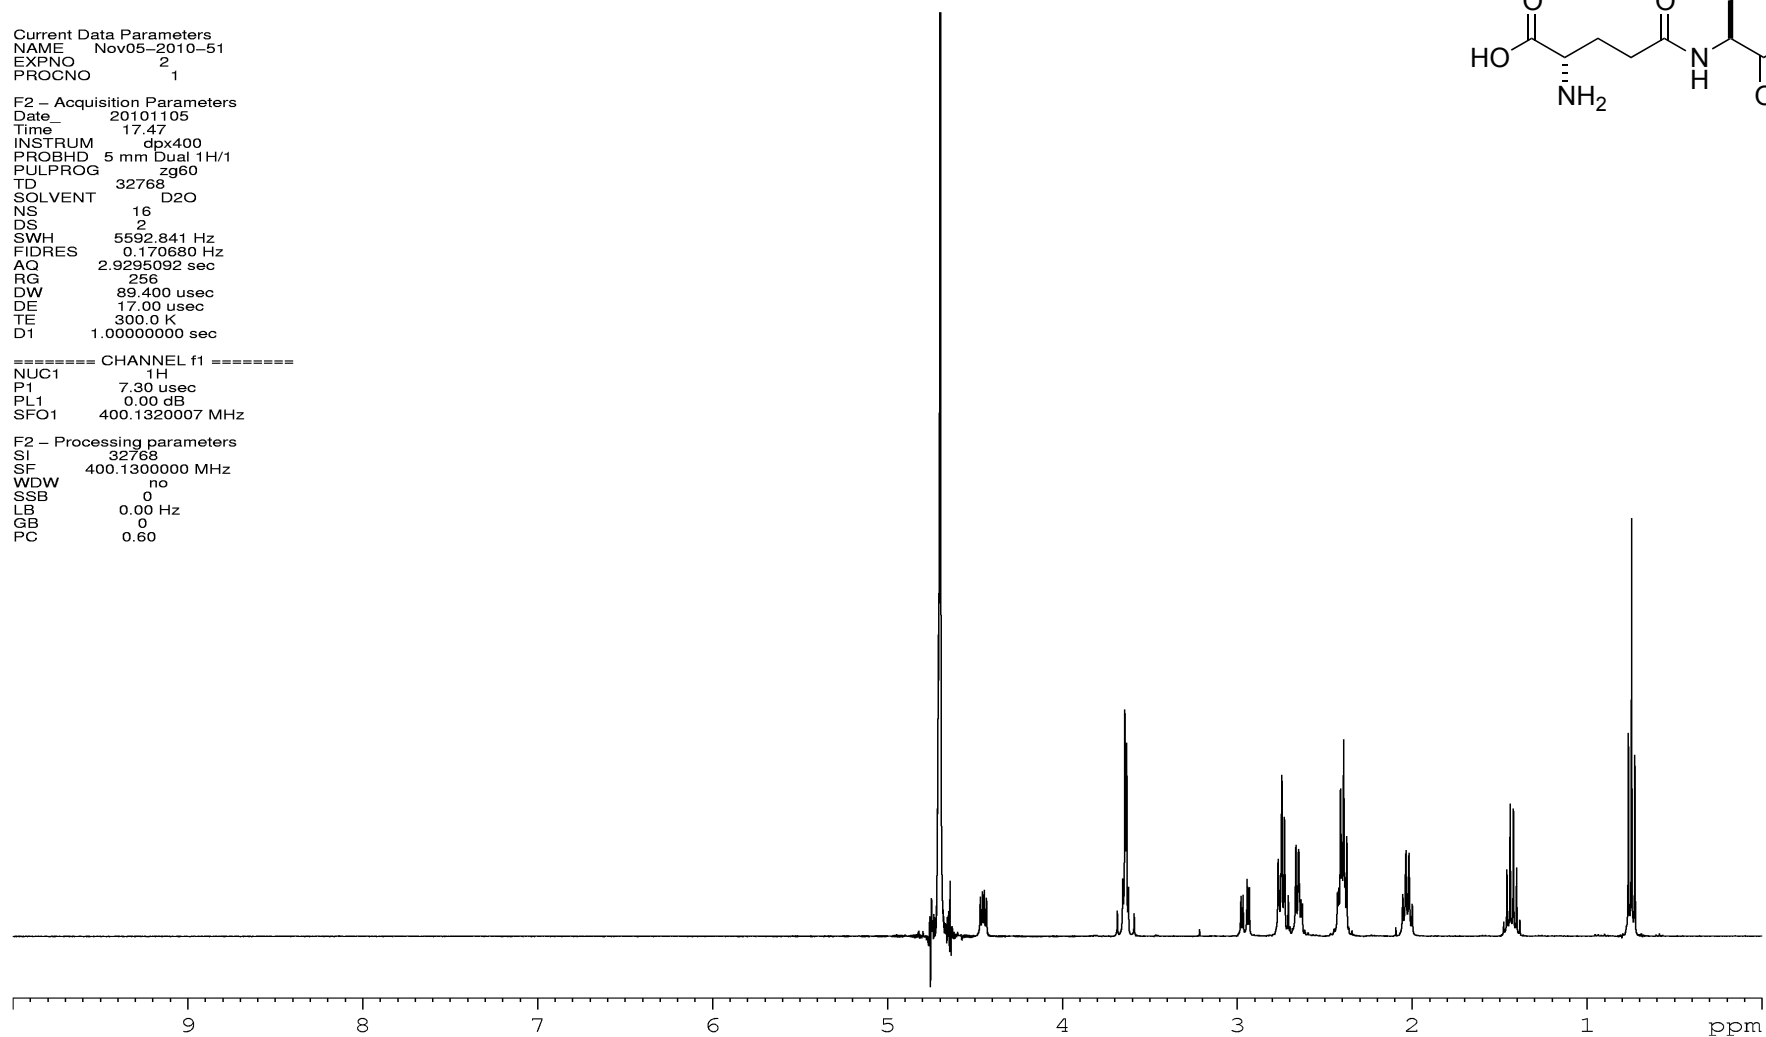

*S*-Hexan-3-on-1-yl glutathione (11)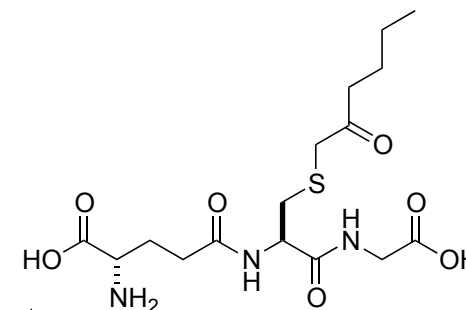

Current Data Parameters  
NAME jh34912603  
EXPNO 3  
PROCNO 1

F2 - Acquisition Parameters  
Date\_ 20130327  
Time 7.04  
INSTRUM avc500  
PROBHD 5 mm CPDUL 13C  
PULPROG zgpg30  
TD 65536  
SOLVENT D2O  
NS 512  
DS 2  
SWH 31250.000 Hz  
FIDRES 0.476837 Hz  
AQ 1.0486259 sec  
RG 912  
DW 16.000 usec  
DE 20.00 usec  
TE 298.0 K  
D1 2.0000000 sec  
D11 0.0300000 sec  
TDO 1

===== CHANNEL f1 =====  
NUC1 13C  
P1 10.25 usec  
PL1 8.00 dB  
PL1W 1.6209624 W  
SFO1 125.8131151 MHz

===== CHANNEL f2 =====  
CPDPRG2 waltz16  
NUC2 1H  
PCPD2 80.00 usec  
PL2 6.00 dB  
PL12 23.56 dB  
PL13 29.56 dB  
PL2W 0.95905519 W  
PL12W 0.01682068 W  
PL13W 0.00422516 W  
SFO2 500.3020012 MHz

F2 - Processing parameters  
SI 32768  
SF 125.8005350 MHz  
WDW EM  
SSB 0  
LB 1.00 Hz  
GB 0  
PC 1.40

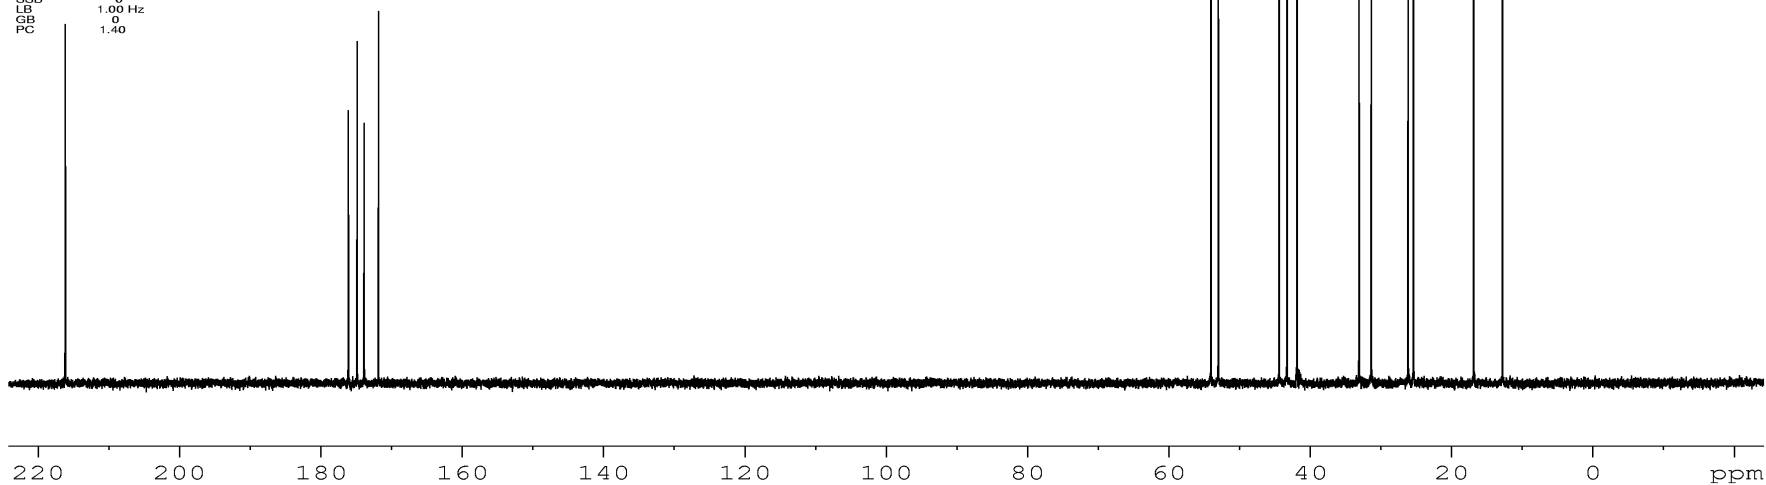

*S*-Octan-3-on-1-yl glutathione (12)

Current Data Parameters  
NAME Dec07-2009-55  
EXPNO 1  
PROCNO 1

F2 - Acquisition Parameters  
Date\_ 20091207  
Time 13.14  
INSTRUM dpx400  
PROBHD 5 mm Dual 1H/1  
PULPROG zg60  
TD 32768  
SOLVENT D2O  
NS 16  
DS 2  
SWH 5592.841 Hz  
FIDRES 0.170680 Hz  
AQ 2.9295092 sec  
RG 203.2  
DW 89.400 usec  
DE 17.00 usec  
TE 300.0 K  
D1 1.0000000 sec

===== CHANNEL f1 =====  
NUC1 1H  
P1 7.30 usec  
PL1 0.00 dB  
SFO1 400.1320007 MHz

F2 - Processing parameters  
SI 32768  
SF 400.1300000 MHz  
WDW EM  
SSB 0  
LB 0.30 Hz  
GB 0  
PC 0.60

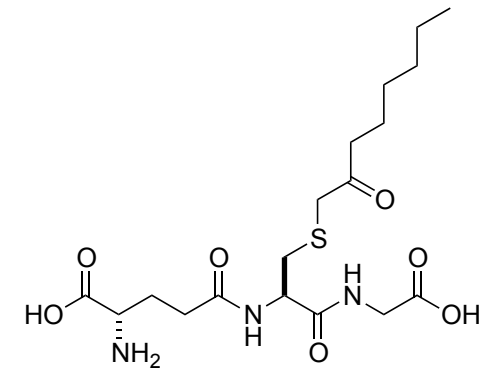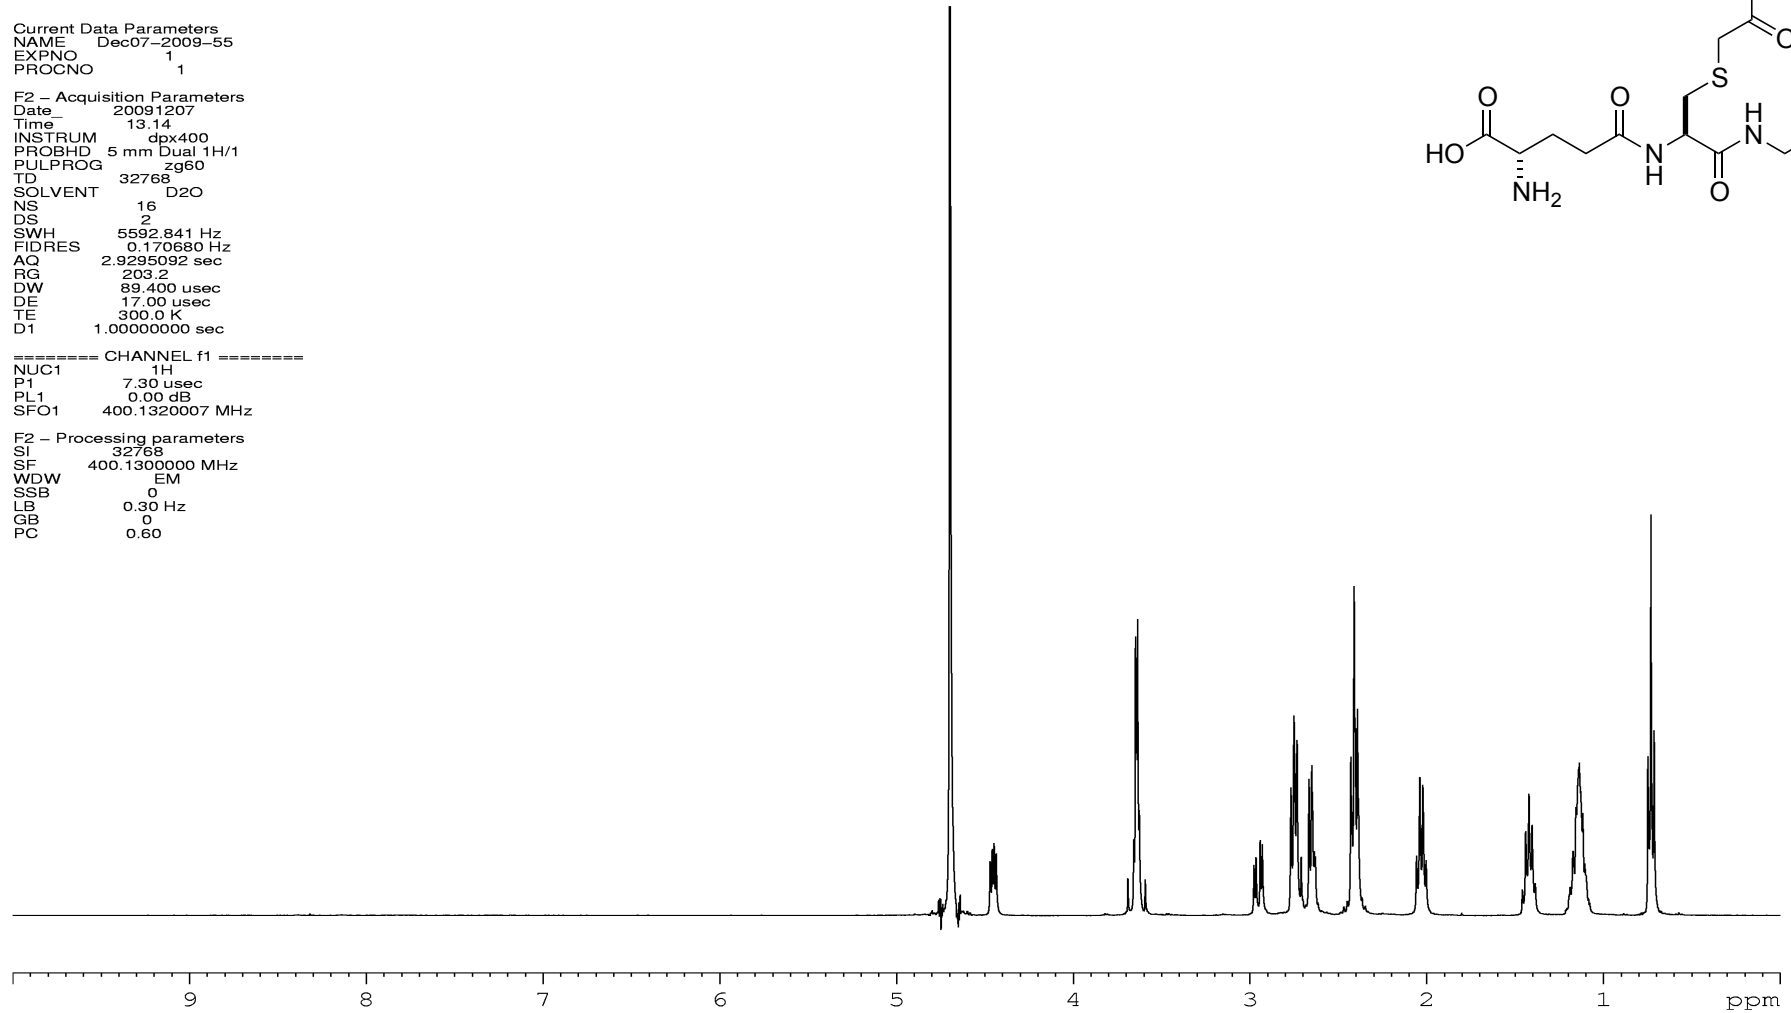

## S-Octan-3-on-1-yl glutathione (12)

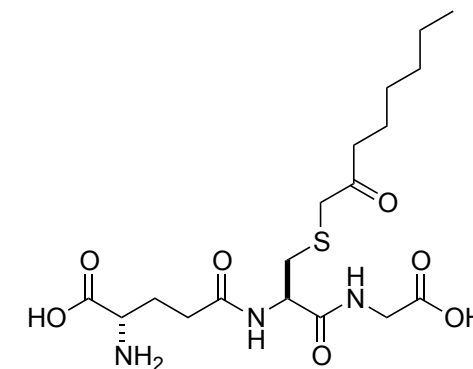

Current Data Parameters  
 NAME jh41762205  
 EXPNO 2  
 PROCNO 1

F2 - Acquisition Parameters  
 Date\_ 20130524  
 Time\_ 6.59  
 INSTRUM avc500  
 PROBHD 5 mm CPDUL 13C  
 PULPROG zgpg30  
 TD 65536  
 SOLVENT D2O  
 NS 2048  
 DS 2  
 SWH 31250.000 Hz  
 FIDRES 0.476837 Hz  
 AQ 1.0486259 sec  
 RG 912  
 DW 16.000 usec  
 DE 20.00 usec  
 TE 298.0 K  
 D1 2.0000000 sec  
 D11 0.0300000 sec  
 TD0 1

===== CHANNEL f1 =====  
 NUC1 13C  
 P1 10.25 usec  
 PL1 8.00 dB  
 PL1W 1.62029624 W  
 SFO1 125.8131151 MHz

===== CHANNEL f2 =====  
 CPDPRG2 waltz16  
 NUC2 1H  
 PCPD2 80.00 usec  
 PL2 6.00 dB  
 PL12 23.56 dB  
 PL13 29.56 dB  
 PL2W 0.95905519 W  
 PL12W 0.01682068 W  
 PL13W 0.00422516 W  
 SFO2 500.3020012 MHz

F2 - Processing parameters  
 SI 32768  
 SF 125.8005350 MHz  
 WDW EM  
 SSB 0  
 LB 1.00 Hz  
 GB 0  
 PC 1.40

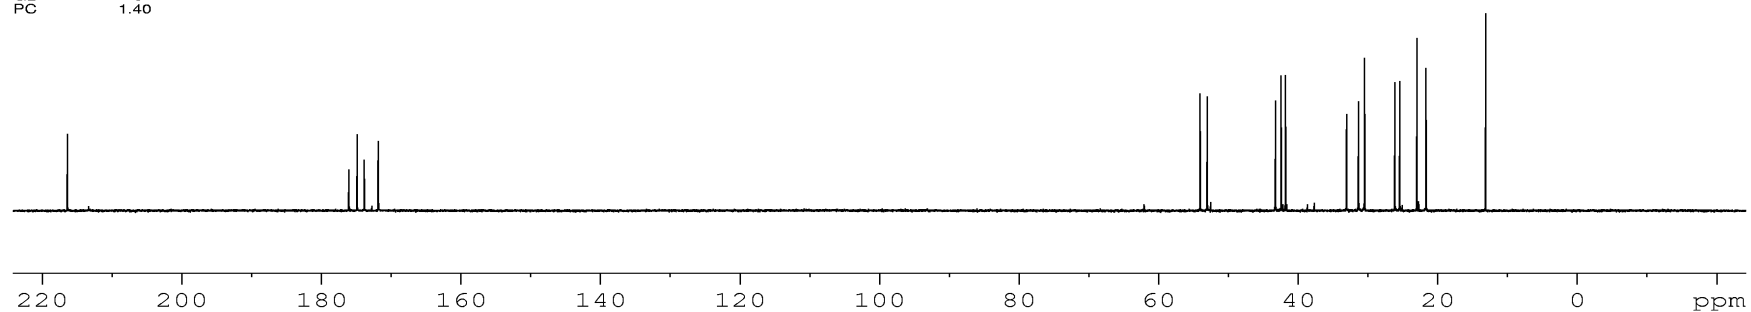

Supplement: bi5001118_si_001.pdf [file bi5001118_si_001.pdf]
